# Supplementary material for: Variation in missed doses and reasons for discontinuation of anti-tuberculosis drugs during hospital treatment for drug-resistant tuberculosis in South Africa
Source: PLoS One. 2023 Feb 13;18(2):e0281097. doi: 10.1371/journal.pone.0281097 (PMC9925007; doi:10.1371/journal.pone.0281097)
Supplement: S4 File — (CSV) [file pone.0281097.s004.csv]

Study Number	Deceased at censor date	Reason for last discharge	Overall Regimen Hospitalization	Number of Hospitalizations	Did diagnosis change after first or subsequent Hospitalizations	Reason for discharge Hospitalization 1	Diagnosis at time of Hospitalization 1	Did Diagnosis change during Hospitalization 1	Additional Diagnosis during Hospitalization 1	Regimen during Hospitalization 1	Duration Hospitalization 1 (days)	Diagnosis before Hospitalization 1	Regimen after Discharge Hospitalization 1	Did Diagnosis change after Discharge Hospitalization 1	Additional Diagnosis after Discharge Hospitalization 1	Reason for Discharge Hospitalization 2	Regimen during Hospitalization 2	Did Diagnosis change during Hospitalization 2	Additional Diagnosis during Hospitalization 2	Duration of Hospitalization 2	Regimen after Discharge Hospitalization 2	Did Diagnosis change after Discharge Hospitalization 2	Additional Diagnosis after Discharge Hospitalization 2	Reason for Discharge Hospitalization 3	Regimen during Hospitalization 3	Did Diagnosis change during Hospitalization 3	Additional Diagnosis during Hospitalization 3	Duration of Hospitalization 3	Regimen after Discharge Hospitalization 3	Did Diagnosis change after Discharge Hospitalization 3	Additional Diagnosis after Discharge Hospitalization 3	Reason for Discharge Hospitalization 4	Regimen during Hospitalization 4	Did Diagnosis change during Hospitalization 4	Additional Diagnosis during Hospitalization 4	Duration of Hospitalization 4	Regimen after Discharge Hospitalization 4	Did Diagnosis change after Discharge Admisson 4	Additional Diagnosis after Discharge Hospitalization 4	Reason for Discharge Hospitalization 5	Regimen during Hospitalization 5	Did Diagnosis change during Hospitalization 5	Additional Diagnosis during Hospitalization 5	Duration of Hospitalization 5	Regimen after Discharge Hospitalization 5	Did Diagnosis change after Discharge Hospitalization 5	Additional Diagnosis after Discharge Hospitalization 5	Reason for Discharge Hospitalization 6	Regimen during Hospitalization 6
1	Yes	Abscond	M/XDR	3	Yes	Improved	MDR	No	-	MDR	148	MDR	MDR	No	-	Discpl Discharge	XDR	Yes	Pre-Inj	181	XDR	Yes	XDR	Abscond	XDR	No	-	269	N/A
2	Yes	Abscond	XDR	1	No	Abscond	Pre-FQ	No	-	XDR	287	MDR	N/A
3	Yes	Abscond	M/XDR	1	Yes	Abscond	Pre-FQ	Yes	XDR	M/XDR	416	MDR	N/A
4	Yes	Died	M/XDR	2	Yes	Abscond	MDR	No	-	MDR	49	MDR	MDR	Yes	XDR	Died	XDR	No	-	174	N/A
5	Yes	Died	M/XDR	1	Yes	Died	MDR	Yes	XDR	M/XDR	179	MDR	N/A
6	No	Improved	M/XDR	1	Yes	Improved	INH-MONO	Yes	INH-FQ	M/XDR	237	INH-MONO	N/A
7	No	Abscond	XDR	4	Yes	Abscond	MDR	No	-	XDR	10	Pre-FQ	None	No	-	Abscond	XDR	No	-	9	XDR	Yes	Pre-FQ	Discpl Discharge	XDR	No	-	40	XDR	No	-	Abscond	XDR	No	-	377	N/A
8	No	Cont NIX trial	XDR	2	Yes	Treatment failure	Pre-FQ	Yes	XDR	XDR	726	MDR	Basic	No	-	Cont NIX trial	XDR/BDQ	No	-	98	N/A
9	Yes	Treatment failure	M/XDR	2	Yes	Unknown	MDR	No	-	MDR	41	MDR	M/XDR	Yes	Pre-FQ	Treatment failure	XDR	No	-	397	N/A
10	Yes	Died	M/XDR	3	Yes	Improved	MDR	No	-	MDR	22	MDR	Unknown	Yes	Pre-FQ	Discpl Discharge	XDR	No	-	192	Unknown	No	-	Died	XDR	No	-	23	N/A
11	Yes	Abscond	M/XDR	5	Yes	Abscond	MDR	Yes	Pre-FQ	MDR	113	MDR	None	Yes	MDR	Improved	MDR	No	-	135	MDR	Yes	Pre-FQ	Abscond	XDR	No	-	79	Unknown	No	-	Abscond	XDR	No	-	156	None	Yes	MDR	Abscond	MDR	No	-	109	N/A
12	Yes	Treatment failure	M/XDR	4	Yes	Abscond	MDR	No	-	MDR	55	MDR	None	No	-	Discpl Discharge	MDR	No	-	112	M/XDR	Yes	Pre-FQ	Abscond	XDR	No	-	105	None	No	-	Treatment failure	XDR	No	-	241	N/A
13	Yes	Treatment Failure	M/XDR	1	Yes	Treatment Failure	MDR	Yes	Pre-FQ	M/XDR	717	MDR	N/A
14	Yes	Treatment Failure	XDR	1	Yes	Treatment Failure	Pre-Inj	Yes	XDR	XDR	333	MDR	N/A
15	Yes	Treatment Failure	XDR	1	Yes	Treatment Failure	MDR	Yes	Pre-FQ	XDR	591	MDR	N/A
16	No	Cont NIX trial	XDR	2	No	Improved	Pre-FQ	No	-	XDR	217	MDR	XDR	No	-	Cont NIX trial	XDR/BDQ	No	-	248	N/A
17	Yes	Died	M/XDR	3	Yes	Improved	MDR	No	-	MDR	129	MDR	MDR	Yes	XDR	Improved	XDR	No	-	810	Unknown	No	-	Died	XDR	No	-	23	N/A
18	Yes	Treatment failure	M/XDR	2	Yes	Abscond	MDR	No	-	MDR	80	MDR	None	No	-	Treatment failure	M/XDR	Yes	XDR	496	N/A
19	Yes	Abscond	M/XDR	2	Yes	Compassionate Discharge	MDR	No	-	MDR	55	MDR	MDR	Yes	Pre-FQ	Abscond	XDR	No	-	391	N/A
20	Yes	Died	M/XDR	1	No	Died	XDR	No	-	M/XDR	801	MDR	N/A
21	Yes	Died	XDR	1	Yes	Died	MDR	Yes	XDR	XDR	688	MDR	N/A
22	Yes	Treatment failure	M/XDR	2	Yes	Improved	Pre-Inj	No	-	MDR	18	MDR	MDR	Yes	XDR	Treatment failure	XDR	No	-	412	N/A
23	Yes	Died	M/XDR	3	Yes	Refused inpt Treatment	MDR	No	-	MDR	24	MDR	Unknown	No	-	Refuse Inpt Treatment	XDR	No	-	201	XDR	Yes	Pre-FQ	Died	XDR	No	-	175	N/A
24	Yes	Treatment failure	M/XDR	3	Yes	Improved	MDR	No	-	MDR	63	MDR	Unknown	No	-	Improved	Unknown	Unknown	-	107	Unknown	Yes	XDR	Treatment failure	XDR	No	-	596	N/A
25	No	On treatment at censor date	M/XDR	3	Yes	Discpl Discharge	MDR	No	-	MDR	104	MDR	None	No	-	Improved	MDR	No	-	158	Unknown	Yes	Pre-FQ	On treatment at sensor date	XDR/BDQ	No	-	771	N/A
26	Yes	Treatment failure	M/XDR	2	Yes	Improved	MDR	No	-	MDR	124	MDR	MDR	No	-	Treatment failure	M/XDR	Yes	Pre-FQ	573	N/A
27	Yes	Treatment failure	M/XDR	2	Yes	Discpl Discharge	MDR	No	-	MDR	149	MDR	MDR	Yes	XDR	Treatment failure	XDR	No	-	352	N/A
28	Yes	Died	M/XDR	1	Yes	Died	MDR	Yes	Pre-FQ	M/XDR	714	MDR	N/A
29	Yes	Died	XDR	1	Yes	Died	MDR	Yes	Pre-FQ	XDR	304	MDR	N/A
30	Yes	Treatment failure	XDR	2	Yes	Abscond	Pre-Inj	No	-	XDR	410	Pre-Inj	XDR	Yes	XDR	Treatment failure	XDR	No	-	71	N/A
31	Yes	Treatment Failure	XDR	1	No	Treatment Failure	XDR	No	-	XDR	938	MDR	N/A
32	Yes	Died	XDR	1	Yes	Died	MDR	Yes	Pre-FQ	XDR	559	MDR	N/A
33	Yes	Died	M/XDR	2	Yes	Improved	MDR	No	-	MDR	128	MDR	MDR	Yes	Pre-FQ	Died	XDR	No	-	153	N/A
34	No	Abscond	XDR	1	Yes	Abscond	Pre-Inj	Yes	XDR	XDR	284	Pre-Inj	N/A
35	Yes	Treatment Failure	XDR	1	No	Treatment Failure	XDR	No	-	XDR	541	Pre-Inj	N/A
36	Yes	Died	M/XDR	2	Yes	Refused inpt Treatment	Pre-FQ	No	-	M/XDR	56	MDR	Unknown	No	-	Died	XDR	Yes	XDR	285	N/A
37	No	Treatment Failure	MDR	1	Yes	Treatment Failure	MDR	Yes	Pre-FQ	MDR	247	MDR	N/A
38	Yes	Died	M/XDR	5	Yes	Improved	INH-MONO	No	-	Reg2+	FALSE	INH-MONO	Unknown	No	-	Improved	Reg2+	No	-	85	Reg2	Yes	MDR	Improved	Unknown	Yes	INH-MONO	13	Reg2+	No	-	Improved	Reg/MDR	No	-	235	Unknown	No	-	Died	XDR	No	-	135	N/A
39	Yes	Died	M/XDR	2	Yes	Improved	MDR	No	-	MDR	120	MDR	MDR	No	-	Died	M/XDR	Yes	Pre-FQ	295	N/A
40	Yes	Treatment Failure	XDR	1	No	Treatment Failure	Pre-FQ	No	-	XDR	259	MDR	N/A
41	No	Treatment Failure	M/XDR	1	No	Treatment Failure	MDR	No	-	M/XDR	721	MDR	N/A
42	No	Improved	XDR	1	No	Improved	XDR	No	-	XDR/BDQ	567	MDR	N/A
43	Yes	Assessment for Sx	M/XDR	1	Yes	Assessment for Sx	Pre-Inj	Yes	XDR	M/XDR	650	Pre-Inj	N/A
44	No	Improved	XDR	1	No	Improved	Pre-FQ	No	-	XDR	243	MDR	N/A
45	Yes	Improved	M/XDR	5	Yes	Improved	MDR	No	-	MDR	124	MDR	MDR	No	-	Abscond	XDR	No	-	74	None	No	-	Abscond	XDR	No	-	135	None	No	-	Abscond	XDR	Yes	Pre-Inj	7	None	No	-	Improved	XDR	No	-	253	N/A
46	Yes	Palliative care	M/XDR	4	Yes	Improved	MDR	No	-	MDR	145	MDR	MDR	No	-	Abscond	MDR	No	-	78	None	Yes	Pre-FQ	Abscond	M/XDR	No	-	234	None	No	-	Palliative care	XDR	No	-	403	N/A
47	Yes	Improved	XDR	1	No	Improved	XDR	No	-	XDR	232	MDR	N/A
49	No	Improved	MDR	1	No	Improved	Pre-FQ	No	-	MDR	145	MDR	N/A
50	Yes	Abscond	M/XDR	1	Yes	Abscond	MDR	Yes	Pre-FQ	M/XDR	467	MDR	N/A
51	Yes	Died	MDR	4	Yes	Unknown	MDR	No	-	Unknown	61	MDR	Unknown	No	-	Abscond	MDR	No	-	126	None	Yes	Pre-FQ	Abscond	MDR	No	-	40	MDR	No	-	Died	MDR	Yes	XDR	88	N/A				-	-
52	Yes	Died	M/XDR	3	Yes	Improved	MDR	No	-	MDR	157	MDR	None	Yes	Pre-FQ	Abscond	XDR	No	-	267	XDR	No	-	Died	XDR	No	-	221	N/A
53	Yes	Improved	XDR	1	Yes	Improved	Pre-Inj	Yes	XDR	XDR	221	Pre-Inj	N/A
54	Yes	Died	M/XDR	1	Yes	Died	MDR	Yes	XDR	M/XDR	229	MDR	N/A
55	Yes	Improved	MDR	2	Yes	Improved	MDR	No	-	MDR	120	MDR	MDR	Yes	Pre-FQ	Improved	MDR	No	-	224	N/A
56	Yes	Died	XDR	2	No	Abscond	Pre-FQ	No	-	XDR	30	MDR	XDR	No	-	Died	XDR	No	-	208	N/A
57	Yes	Treatment failure	M/XDR	4	Yes	Refused inpt Treatment	MDR	No	-	MDR	4	MDR	MDR	No	-	Abscond	XDR	No	-	180	XDR	No	-	Improved	XDR	No	-	295	XDR	Yes	XDR	Treatment failure	XDR	No	-	76	N/A
58	Yes	Died	XDR	1	No	Died	XDR	No	-	XDR	17	XDR	N/A
59	Yes	Died	XDR	1	Yes	Died	Pre-Inj	Yes	XDR	XDR	128	Pre-Inj	N/A
60	No	Abscond	XDR	1	No	Abscond	Pre-FQ	No	-	XDR	138	MDR	N/A
61	Yes	Died	M/XDR	1	Yes	Died	MDR	Yes	Pre-FQ	M/XDR	447	MDR	N/A
62	Yes	Died	M/XDR	2	No	Refused inpt Treatment	XDR	No	-	M/XDR	291	Pre-Inj	XDR	No	-	Died	XDR	No	-	122	N/A
63	No	Improved	M/XDR	2	No	Abscond	Pre-FQ	No	-	MDR	9	MDR	XDR	No	-	Improved	XDR/BDQ	No	-	1135	N/A
64	No	Abscond	XDR	1	Yes	Abscond	Pre-Inj	Yes	XDR	XDR	256	Pre-Inj	N/A
65	Yes	Treatment failure	M/XDR	2	Yes	Improved	MDR	No	-	MDR	114	MDR	MDR	Yes	Pre-FQ/Inj	Treatment failure	XDR	No	-	476	N/A
66	Yes	Abscond	XDR	1	Yes	Abscond	Pre-Inj	Yes	XDR	XDR	115	Pre-Inj	N/A
67	Yes	Died	XDR	2	Yes	Abscond	Pre-Inj	Yes	XDR	XDR	193	Pre-Inj	Unknown	No	-	Died	Unknown	No	-	13	N/A
68	Yes	Abscond	M/XDR	5	Yes	Abscond	MDR	No	-	MDR	35	MDR	Unknown	Yes	Pre-FQ	Unknown	Unknown	No	-	0	Unknown	Yes	XDR	Abscond	XDR	No	-	162	None	Yes	Pre-FQ	Abscond	XDR	No	-	163	Unknown	No	-	Abscond	XDR	No	-	137	N/A		-
69	Yes	Treatment failure	M/XDR	2	Yes	Improved	MDR	Yes	Pre-FQ	M/XDR	306	MDR	XDR	No	-	Treatment failure	XDR	No	-	157	N/A
70	Yes	Died	XDR	1	Yes	Died	MDR	Yes	Pre-FQ	XDR	284	MDR	N/A
71	Yes	Died	M/XDR	2	No	Discpl Discharge	Pre-FQ	No	-	M/XDR	97	MDR	XDR	No	-	Died	XDR	No	-	104	N/A
72	Yes	Died	M/XDR	2	Yes	Refused inpt Treatment	MDR	Yes	Pre-FQ	MDR	224	MDR	None	Yes	XDR	Died	XDR	No	-	32	N/A
73	Yes	Died	MDR	2	Yes	Improved	MDR	No	-	MDR	178	MDR	MDR	Yes	Pre-FQ	Died	MDR	No	-	28	N/A
74	Yes	Died	M/XDR	1	Yes	Died	Pre-Inj	Yes	XDR	M/XDR	154	Pre-Inj	N/A
75	Yes	Died	MDR	2	No	Abscond	MDR	No	-	MDR	40	MDR	None	No	-	Died	MDR	No	-	242	N/A
76	Yes	Died	M/XDR	2	No	Abscond	Pre-FQ	No	-	M/XDR	50	MDR	None	No	-	Died	XDR	No	-	50	N/A
77	Yes	Palliative care	M/XDR	1	Yes	Palliative care	MDR	Yes	Pre-FQ	M/XDR	650	MDR	N/A
78	Yes	Treatment Failure	XDR	1	Yes	Treatment Failure	Pre-Inj	Yes	XDR	XDR	500	Pre-Inj	N/A
79	Yes	Treatment failure	M/XDR	4	Yes	Abscond	MDR	No	-	MDR	67	MDR	MDR	Yes	Pre-Inj	Abscond	XDR	Yes	XDR	163	XDR	No	-	Abscond	XDR	No	-	106	None	No	-	Treatment failure	MDR	Yes	Pre-FQ	125	N/A
80	Yes	Died	XDR	2	Yes	Discpl Discharge	MDR	No	-	XDR	126	MDR	MDR	No	-	Died	XDR	Yes	Pre-FQ	367	N/A
81	Yes	Died	XDR	2	Yes	Refused inpt Treatment	MDR	No	-	XDR	121	MDR	None	Yes	XDR	Died	BDQ	No	-	63	N/A
82	Yes	Improved	M/XDR	1	Yes	Improved	Pre-Inj	Yes	XDR	M/XDR	193	None	N/A
83	Yes	Abscond	M/XDR	2	Yes	Improved	MDR	Yes	Pre-FQ	MDR	42	MDR	MDR	Yes	XDR	Abscond	XDR	No	-	514	N/A
84	Yes	Died	M/XDR	3	Yes	Improved	MDR	No	-	M/XDR	392	MDR	XDR	Yes	Pre-FQ	Abscond	XDR	No	-	229	None	Yes	MDR	Died	XDR	Yes	Pre-FQ	74	N/A
85	Yes	Died	M/XDR	2	Yes	Improved	MDR	No	-	MDR	214	MDR	MDR	No	-	Died	M/XDR	Yes	Pre-FQ	67	N/A
86	Yes	Died	M/XDR	2	Yes	Abscond	MDR	No	-	Unknown	6	None	Unknown	Yes	Pre-FQ	Died	M/XDR	No	-	188	N/A
87	Yes	Improved	M/XDR	4	Yes	Improved	MDR	No	-	MDR	178	MDR	MDR	No	-	Abscond	MDR	No	-	20	MDR	No	-	Abscond	XDR	No	-	93	XDR	Yes	Pre-FQ	Improved	XDR	No	-	254	N/A
88	Yes	Died	XDR	1	Yes	Died	Pre-FQ	Yes	XDR	XDR	465	MDR	N/A
89	Yes	Died	M/XDR	1	Yes	Died	Pre-Inj	Yes	XDR	M/XDR	285	Pre-Inj	N/A
90	No	Improved	XDR	1	Yes	Improved	RIF -MONO-INJ	Yes	RIF-MONO+FO+INJ	XDR	245	RIF-MONO	N/A
91	Yes	Died	M/XDR	1	Yes	Died	Pre-Inj	Yes	XDR	M/XDR	236	Pre-Inj	N/A
92	Yes	Treatment Failure	XDR	1	No	Treatment Failure	XDR	No	-	XDR	407	MDR	N/A
93	Yes	Abscond	XDR	2	Yes	Refused inpt Treatment	MDR	No	-	XDR	126	MDR	None	No	-	Abscond	XDR	Yes	XDR	343	N/A
94	Yes	Died	MDR	2	Yes	Abscond	MDR	No	-	MDR	179	MDR	Unknown	Yes	Pre-FQ	Died	Unknown	No	-	57	N/A
95	No	Improved	M/XDR	2	Yes	Improved	MDR	No	-	MDR	167	None	Unknown	Yes	Pre-FQ	Improved	XDR	Yes	Pre-Inj	301	N/A
96	Yes	Died	M/XDR	1	Yes	Died	MDR	Yes	XDR	M/XDR	379	MDR	N/A
97	Yes	Improved	MDR	1	No	Improved	MDR	No	-	MDR	166	MDR	N/A
98	No	On treatment at censor date	XDR	2	Yes	Improved	MDR	Yes	Pre-FQ	XDR	339	MDR	XDR	No	-	On treatment at sensor date	XDR	No	-	37	N/A
99	Yes	Died	M/XDR	4	Yes	Abscond	MDR	No	-	MDR	5	MDR	None	Yes	Pre-FQ	Abscond	MDR	No	-	28	None	No	-	Discpl Discharge	XDR	No	-	34	None	No	-	Died	XDR	No	-	30	N/A
100	Yes	Died	M/XDR	1	Yes	Died	MDR	Yes	Pre-FQ	M/XDR	293	MDR	N/A
101	Yes	Abscond	XDR	1	Yes	Abscond	Pre-Inj	Yes	XDR	XDR	318	Pre-Inj	N/A
102	Yes	Treatment failure	M/XDR	3	Yes	Transfer out	MDR	No	-	XDR	125	MDR	MDR	No	-	Improved	M/XDR	Yes	Pre-FQ	511	XDR	Yes	XDR	Treatment failure	XDR	No	-	511	N/A
103	Yes	Died	XDR	2	Yes	Abscond	Pre-Inj	No	-	XDR	152	Pre-Inj	Unknown	No	-	Died	XDR	Yes	XDR	161	N/A
104	Yes	Died	MDR	2	Yes	Improved	MDR	No	-	MDR	77	MDR	MDR	Yes	XDR	Died	MDR	No	-	32	N/A
105	Yes	Treatment Failure	M/XDR	1	Yes	Treatment Failure	MDR	Yes	XDR	M/XDR	553	MDR	N/A
106	No	Improved	M/XDR	2	Yes	Improved	MDR	No	-	MDR	52	None	MDR	Yes	Pre-FQ	Improved	MDR	No	-	191	N/A
107	Yes	Treatment Failure	XDR	1	No	Treatment Failure	XDR	No	-	XDR	391	MDR	N/A
108	Yes	Treatment Failure	M/XDR	1	Yes	Treatment Failure	Pre-Inj	Yes	XDR	M/XDR	290	Pre-Inj	N/A
109	No	Improved	XDR	1	No	Improved	Pre-FQ	No	-	XDR	273	MDR	N/A
110	No	Improved	M/XDR	1	No	Improved	Pre-FQ	No	-	M/XDR	188	MDR	N/A
111	No	Improved	XDR	1	No	Improved	XDR	No	-	XDR	387	MDR	N/A
112	Yes	Refuse Inpt Treatment	MDR	1	No	Refuse Inpt Treatment	MDR	No	-	MDR	120	MDR	N/A
113	No	Improved	M/XDR	3	Yes	Improved	MDR	No	-	MDR	142	MDR	MDR	No	-	Abscond	M/XDR	No	-	269	MDR	Yes	Pre-FQ	Improved	XDR	No	-	268	N/A
114	Yes	Improved	XDR	1	Yes	Improved	Pre-FQ	Yes	Pre-Inj	XDR	273	MDR	N/A
115	Yes	Treatment Failure	M/XDR	1	Yes	Treatment Failure	Pre-Inj	Yes	XDR	M/XDR	413	Pre-Inj	N/A
116	Yes	Died	M/XDR	2	Yes	Improved	MDR	No	-	MDR	156	MDR	MDR	No	-	Died	M/XDR	Yes	Pre-FQ	254	N/A
117	Yes	Improved	M/XDR	2	Yes	Improved	MDR	No	-	MDR	161	MDR	MDR	Yes	Pre-FQ	Improved	XDR	No	-	312	N/A
118	Yes	Abscond	M/XDR	5	Yes	Abscond	MDR	No	-	MDR	2	MDR	None	No	-	Abscond	MDR	No	-	22	Unknown	No	-	Refuse Inpt Treatment	Unknown	No	-	1	Unknown	No	-	Refuse Inpt Treatment	MDR	Yes	Pre-FQ	93	None	No	-	Abscond	XDR	No	-	72	N/A
119	Yes	Treatment Failure	M/XDR	1	Yes	Treatment Failure	Pre-Inj	Yes	XDR	M/XDR	486	Pre-Inj	N/A
120	Yes	Died	M/XDR	6	Yes	Improved	MDR	No	-	MDR	184	MDR	MDR	No	-	Improved	XDR	No	-	182	XDR	No	-	Refuse Inpt Treatment	XDR	No	-	2	XDR	No	-	Improved	XDR	No	-	218	XDR	No	-	Improved	XDR	No	-	5	XDR	Yes	Pre-FQ	Died	XDR
121	No	Improved	XDR	1	Yes	Improved	Pre-Inj	Yes	XDR	XDR	215	Pre-Inj	N/A
122	Yes	Treatment Failure	XDR	1	No	Treatment Failure	XDR	No	-	XDR	411	MDR	N/A
123	Yes	Treatment Failure	XDR	1	Yes	Treatment Failure	Pre-FQ	Yes	XDR	XDR	436	Pre-Inj	N/A
124	Yes	Died	M/XDR	2	No	Refused inpt Treatment	MDR	No	-	MDR	43	MDR	MDR	No	-	Died	XDR	No	-	233	N/A
125	Yes	Improved	XDR	2	Yes	Improved	Pre-Inj	No	-	XDR	188	Pre-Inj	XDR	Yes	XDR	Improved	XDR	No	-	347	N/A
126	Yes	Abscond	M/XDR	2	No	Improved	MDR	No	-	MDR	141	MDR	MDR	No	-	Abscond	XDR	No	-	186	N/A
127	Yes	Died	XDR	2	No	Improved	Pre-FQ	No	-	XDR	197	MDR	XDR	No	-	Died	XDR	No	-	249	N/A
128	No	Treatment failure	M/XDR	4	Yes	Abscond	Pre-Inj	No	-	MDR	96	Pre-Inj	None	No	-	Improved	XDR	Yes	XDR	208	XDR	No	-	Abscond	XDR	No	-	106	None	No	-	Treatment failure	XDR	No	-	266	N/A
129	No	Improved	XDR	3	No	Abscond	XDR	No	-	XDR	106	Pre-Inj	Unknown	No	-	Abscond	XDR	No	-	501	Unknown	No	-	Improved	XDR	No	-	169	N/A
130	Yes	Treatment Failure	XDR	1	Yes	Treatment Failure	Pre-Inj	Yes	XDR	XDR	719	Pre-Inj	N/A
131	Yes	Treatment failure	M/XDR	2	Yes	Improved	MDR	No	-	MDR	133	MDR	MDR	No	-	Treatment failure	M/XDR	Yes	XDR	652	N/A
132	Yes	Died	M/XDR	1	Yes	Died	MDR	Yes	XDR	M/XDR	531	MDR	N/A
133	No	Cured	XDR	1	Yes	Cured	Pre-FQ	Yes	XDR	XDR/BDQ	700	MDR	N/A
134	Yes	Discpl Discharge	M/XDR	1	Yes	Discpl Discharge	Pre-Inj	Yes	Pre-FQ	M/XDR	217	MDR	N/A
135	Yes	Treatment failure	M/XDR	2	Yes	Improved	MDR	Yes	Pre-Inj	MDR	173	MDR	MDR	Yes	-	Treatment failure	XDR	No	-	336	N/A
136	Yes	Repeat findings of NTM	M/XDR	2	Yes	Discpl Discharge	MDR	Yes	Pre-FQ	MDR	188	MDR	MDR	No	-	Repeat findings of NTM	XDR	Yes	Pre-Inj	293	N/A
137	Yes	Refuse Inpt Treatment	M/XDR	1	Yes	Refuse Inpt Treatment	MDR	Yes	Pre-FQ	M/XDR	639	MDR	N/A
138	Yes	Treatment Failure	M/XDR	1	No	Treatment Failure	Pre-FQ	No	-	M/XDR	396	Pre-FQ	N/A
139	No	Cured	XDR	2	No	Abscond	XDR	No	-	XDR	194	Pre-Inj	XDR	No	-	Cured	XDR/BDQ	No	-	368	N/A
140	No	Abscond	M/XDR	3	Yes	Improved	MDR	No	-	MDR	153	MDR	MDR	Yes	Pre-FQ	Abscond	MDR	No	-	2	M/XDR	No	-	Abscond	XDR	No	-	51	N/A
141	No	Treatment failure	M/XDR	2	Yes	Improved	MDR	No	-	MDR	224	MDR	MDR	Yes	Pre-FQ	Treatment failure	XDR	No	-	501	N/A
142	No	Improved	XDR	2	Yes	Abscond	Pre-FQ	No	-	XDR	263	MDR	Unknown	No	-	Improved	XDR/BDQ	Yes	XDR	215	N/A
143	Yes	Died	XDR	2	No	Abscond	Pre-FQ	No	-	XDR	128	MDR	XDR	No	-	Died	XDR	No	-	72	N/A
144	Yes	Died	XDR	2	Yes	Transfer out	Pre-Inj	Yes	XDR	XDR	245	Pre-Inj	None	No	-	Died	XDR	No	-	91	N/A
145	Yes	Abscond	XDR	1	No	Abscond	Pre-FQ	No	-	XDR	177	Pre-FQ	N/A
146	Yes	Abscond	XDR	1	No	Abscond	Pre-FQ	No	-	XDR	189	Pre-Inj	N/A
147	Yes	Died	M/XDR	5	Yes	Improved	Pre-Inj	No	-	MDR	112	Pre-Inj	Unknown	Yes	MDR	Improved	MDR	No	-	35	MDR	No	-	Unknown	N/A	No	-	34	MDR	No	-	Abscond	XDR	Yes	XDR	115	None	No	-	Died	XDR	No	-	81	N/A
148	Yes	Abscond	XDR	1	Yes	Abscond	Pre-Inj	Yes	XDR	XDR	397	Pre-Inj	N/A
149	Yes	Treatment Failure	M/XDR	1	Yes	Treatment Failure	MDR	Yes	Pre-FQ	M/XDR	438	MDR	N/A
150	Yes	Improved	M/XDR	1	No	Improved	Pre-FQ	No	-	M/XDR	418	MDR	N/A
151	Yes	Treatment Failure	XDR	1	No	Treatment Failure	Pre-FQ	No	-	XDR	414	Pre-FQ	N/A
152	Yes	Abscond	XDR	2	No	Abscond	Pre-FQ	No	-	XDR	192	MDR	XDR	No	-	Abscond	XDR	No	-	165	N/A
153	Yes	Discpl Discharge	XDR	2	No	Abscond	Pre-FQ	No	-	XDR	160	Pre-Inj	None	No	-	Discpl Discharge	XDR	No	-	272	N/A
154	Yes	Died	XDR	1	No	Died	XDR	No	-	XDR	142	Pre-Inj	N/A
155	Yes	Improved	M/XDR	2	No	Abscond	MDR	No	-	MDR	168	MDR	None	No	-	Improved	XDR	No	-	274	N/A
156	Yes	Died	MDR	2	Yes	Refused inpt Treatment	INH-MONO	Yes	MDR	MDR	110	INH-MONO	MDR	Yes	Pre-FQ	Died	MDR	No	-	20	N/A
157	Yes	Improved	M/XDR	3	Yes	Abscond	MDR	Yes	Pre-FQ	M/XDR	130	MDR	Unknown	No	-	Abscond	XDR	No	-	153	XDR	No	-	Improved	XDR	No	-	205	N/A
158	Yes	Died	XDR	1	Yes	Died	Pre-Inj	Yes	XDR	XDR	421	Pre-Inj	N/A
159	Yes	Died	M/XDR	3	No	Improved	XDR	No	-	MDR	50	Pre-Inj	XDR	No	-	Improved	XDR	No	-	266	XDR	No	-	Died	XDR/BDQ	No	-	640	N/A
160	Yes	Died	XDR	1	No	Died	Pre-FQ	No	-	XDR	225	Pre-Inj	N/A
161	Yes	Died	XDR	1	No	Died	XDR	No	-	XDR	249	Pre-Inj	N/A
162	Yes	Abscond	XDR	1	No	Abscond	XDR	No	-	XDR	232	MDR	N/A
163	Yes	Abscond	M/XDR	1	No	Abscond	Pre-FQ	No	-	M/XDR	378	MDR	N/A
164	Yes	Died	M/XDR	1	Yes	Died	Pre-Inj	Yes	XDR	M/XDR	291	Pre-Inj	N/A
165	No	Improved	M/XDR	3	Yes	Improved	MDR	No	-	MDR	121	MDR	MDR	Yes	Pre-FQ	Improved	XDR	No	-	156	XDR	No	-	Improved	XDR	No	-	247	N/A
166	Yes	Abscond	M/XDR	2	Yes	Abscond	Pre-Inj	No	-	M/XDR	137	Pre-Inj	None	No	-	Abscond	XDR	Yes	XDR	80	N/A
167	Yes	Died	XDR	2	No	Treatment failure	XDR	No	-	XDR	558	MDR	Basic	No	-	Died	XDR	No	-	60	N/A
168	Yes	Died	M/XDR	2	Yes	Improved	MDR	No	-	MDR	196	MDR	MDR	Yes	Pre-FQ	Died	XDR	No	-	39	N/A
169	Yes	Treatment Failure	XDR	1	No	Treatment Failure	XDR	No	-	XDR	308	MDR	N/A
171	No	Transfer	M/XDR	2	Yes	Improved	MDR	No	-	MDR	198	None	MDR	Yes	Pre-FQ	Transfer	XDR	No	-	605	N/A
172	No	Transfer Out	M/XDR	1	No	Transfer Out	Pre-FQ	No	-	M/XDR	450	DS-TB	N/A
173	Yes	Discpl Discharge	M/XDR	2	Yes	Abscond	MDR	No	-	MDR	51	MDR	MDR	No	-	Discpl Discharge	XDR	Yes	Pre-FQ	347	N/A
174	Yes	Died	M/XDR	1	Yes	Died	Pre-Inj	Yes	XDR	M/XDR	77	Pre-Inj	N/A
175	Yes	Improved	MDR	1	No	Improved	Pre-FQ	No	-	MDR	177	Pre-FQ	N/A
176	No	Improved	M/XDR	4	Yes	Treatment failure	MDR	No	-	MDR	229	MDR	MDR	No	-	Improved	XDR	Yes	Pre-FQ	188	XDR	Yes	Pre-Inj	Treatment failure	XDR	No	-	453	None	No	-	Improved	BDQ	No	-	57	N/A
177	Yes	Treatment Failure	XDR	1	No	Treatment Failure	Pre-FQ	No	-	XDR	610	MDR	N/A
178	Yes	Treatment Failure	M/XDR	1	Yes	Treatment Failure	MDR	Yes	XDR	M/XDR	566	MDR	N/A
179	Yes	Died	M/XDR	3	Yes	Improved	MDR	No	-	MDR	11	MDR	MDR	Yes	Pre-FQ	Improved	MDR	No	-	104	MDR	No	-	Died	XDR	No	-	928	N/A
180	Yes	Abscond	M/XDR	2	Yes	Abscond	MDR	Yes	Pre-FQ	M/XDR	134	MDR	None	No	-	Abscond	XDR	No	-	98	N/A
181	No	Improved	M/XDR	4	Yes	Abscond	MDR	Yes	Pre-FQ	M/XDR	58	MDR	None	Yes	MDR	Discpl Discharge	XDR	No	-	239	XDR	No	-	Improved	XDR	Yes	Pre-FQ	173	XDR	No	-	Improved	XDR	No	-	138	N/A
182	No	Improved	XDR	3	Yes	Refused inpt Treatment	Pre-Inj	No	-	XDR	222	Pre-Inj	XDR	No	-	Improved	XDR	Yes	XDR	170	XDR	No	-	Improved	XDR/BDQ	No	-	570	N/A
183	No	Improved	XDR	2	No	Improved	Pre-FQ	No	-	XDR	255	MDR	XDR	No	-	Improved	XDR/BDQ	No	-	301	N/A
184	Yes	Treatment failure	XDR	2	No	Improved	Pre-FQ	No	-	XDR	198	MDR	M/XDR	No	-	Treatment failure	XDR	No	-	129	N/A
185	Yes	Treatment Failure	XDR	1	No	Treatment Failure	Pre-FQ	No	-	XDR	311	MDR	N/A
186	No	Treatment Failure	XDR	1	No	Treatment Failure	Pre-FQ	No	-	XDR	416	MDR	N/A
187	Yes	Refuse Inpt Treatment	XDR	2	No	Improved	Pre-Inj	No	-	XDR	153	Pre-Inj	XDR	No	-	Refuse Inpt Treatment	XDR	No	-	120	N/A
188	Yes	Improved	M/XDR	2	Yes	Refused inpt Treatment	MDR	No	-	MDR	69	MDR	MDR	No	-	Improved	XDR	Yes	Pre-FQ	172	N/A
189	Yes	Abscond	XDR	1	No	Abscond	Pre-FQ	No	-	XDR	216	MDR	N/A
190	Yes	Died	M/XDR	4	Yes	Abscond	MDR	No	-	MDR	27	MDR	Unknown	Yes	Pre-Inj	Abscond	XDR	No	-	37	None	No	-	Abscond	XDR	No	-	102	None	No	-	Died	XDR	No	-	421	N/A
191	Yes	Treatment failure	XDR	2	Yes	Abscond	Pre-Inj	Yes	XDR	XDR	142	Pre-Inj	XDR	No	-	Treatment failure	XDR	No	-	422	N/A
192	Yes	Died	M/XDR	4	Yes	Abscond	MDR	No	-	MDR	98	MDR	MDR	No	-	On pt request	M/XDR	Yes	Pre-FQ	554	XDR	No	-	Treatment failure	XDR	No	-	401	XDR	No	-	Died	Basic	No	-	49	N/A
193	Yes	Transfer to Hosp WC	XDR	1	No	Transfer to Hosp WC	Pre-FQ	No	-	XDR	78	None	N/A
194	Yes	Died	M/XDR	3	Yes	Compassionate Discharge	MDR	Yes	Pre-FQ	MDR	95	MDR	MDR	No	-	Abscond	XDR	No	-	134	None	No	-	Died	Palliative	Yes	XDR	27	N/A
195	Yes	Died	MDR	2	Yes	Abscond	MDR	No	-	MDR	86	MDR	None	No	-	Died	MDR	Yes	Pre-Inj	3	N/A
196	No	Abscond	MDR	1	No	Abscond	MDR	No	-	MDR	104	MDR	N/A
197	Yes	Abscond	M/XDR	2	Yes	Abscond	MDR	No	-	MDR	68	MDR	MDR	Yes	Pre-Inj	Abscond	M/XDR	Yes	Pre-FQ	548	N/A
198	Yes	Treatment Failure	M/XDR	1	Yes	Treatment Failure	MDR	Yes	XDR	M/XDR	381	MDR	N/A
199	Yes	Transfer Out	M/XDR	1	Yes	Transfer Out	MDR	Yes	Pre-Inj	M/XDR	459	MDR	N/A
200	No	Treatment Failure	XDR	1	No	Treatment Failure	Pre-Inj	No	-	XDR	377	MDR	N/A
201	Yes	Abscond	M/XDR	3	No	Discpl Discharge	MDR	No	-	MDR	28	INH-MONO	MDR	No	-	Discpl Discharge	MDR	No	-	215	MDR	No	-	Abscond	XDR	No	-	158	N/A
202	Yes	Died	XDR	2	No	Discpl Discharge	Pre-Inj	No	-	XDR	105	Pre-Inj	None	No	-	Died	XDR	No	-	188	N/A
203	Yes	Improved	M/XDR	2	No	Improved	MDR	No	-	MDR	197	MDR	MDR	No	-	Improved	M/XDR	No	-	391	N/A
204	Yes	Died	M/XDR	1	Yes	Died	MDR	Yes	Pre-Inj	M/XDR	417	MDR	N/A
205	Yes	Died	XDR	2	No	Improved	XDR	No	-	XDR	328	Pre-FQ	XDR	No	-	Died	XDR	No	-	462	N/A
206	Yes	Died	M/XDR	1	Yes	Died	MDR	Yes	Pre-Inj	M/XDR	106	MDR	N/A
207	Yes	Died	M/XDR	2	Yes	Improved	MDR	Yes	Pre-FQ	MDR	114	MDR	MDR	No	-	Died	M/XDR	Yes	Pre-Inj	772	N/A
208	Yes	Improved	M/XDR	1	Yes	Improved	MDR	Yes	Pre-Inj	M/XDR	163	MDR	N/A
209	No	Discpl Discharge	MDR	1	Yes	Discpl Discharge	MDR	Yes	Pre-Inj	MDR	320	MDR	N/A
210	Yes	Refuse Inpt Treatment	XDR	1	No	Refuse Inpt Treatment	XDR	No	-	XDR	184	MDR	N/A
211	Yes	Died	XDR	1	No	Died	Pre-Inj	No	-	XDR	16	Pre-FQ	N/A
212	Yes	Died	XDR	1	No	Died	XDR	No	-	XDR	335	MDR	N/A
213	Yes	Treatment failure	M/XDR	2	Yes	Improved	MDR	No	-	MDR	118	MDR	MDR	Yes	XDR	Treatment failure	XDR	No	-	752	N/A
214	Yes	Treatment failure	MDR	2	No	Abscond	MDR	No	-	MDR	36	MDR	MDR	No	-	Treatment failure	MDR	No	-	174	N/A
215	Yes	Refuse Treatment	M/XDR	4	Yes	Abscond	INH-MONO	No	-	MDR	58	INH-MONO	None	Yes	Pre-Inj	Abscond	MDR	No	-	4	None	No	-	Improved	XDR	No	-	210	XDR	Yes	INH-MONO	Refuse Treatment	XDR	No	-	6	N/A
216	Yes	Abscond	XDR	1	No	Abscond	Pre-Inj	No	-	XDR	41	MDR	N/A
217	Yes	Treatment Failure	M/XDR	1	Yes	Treatment Failure	MDR	Yes	Pre-Inj	M/XDR	636	MDR	N/A
219	Yes	Died	MDR	2	No	Improved	MDR	No	-	MDR	119	MDR	MDR	No	-	Died	MDR	No	-	136	N/A
220	Yes	Died	XDR	1	No	Died	Pre-Inj	No	-	XDR	349	MDR	N/A
221	No	Improved	M/XDR	3	No	Abscond	MDR	No	-	MDR	108	MDR	MDR	No	-	Abscond	MDR	No	-	78	MDR	No	-	Improved	XDR	No	-	277	N/A
222	Yes	Improved	M/XDR	2	No	Improved	MDR	No	-	MDR	183	MDR	MDR	No	-	Improved	XDR	No	-	194	N/A
224	No	Abscond	XDR	1	No	Abscond	MDR	No	-	XDR	81	MDR	N/A
225	No	Improved	XDR	1	No	Improved	MDR	No	-	XDR	191	None	N/A
227	Yes	Improved	M/XDR	2	No	Improved	MDR	No	-	MDR	210	MDR	MDR	No	-	Improved	XDR	No	-	219	N/A
228	No	Discpl Discharge	M/XDR	1	No	Discpl Discharge	MDR	No	-	M/XDR	210	MDR	N/A
229	Yes	Abscond	M/XDR	3	No	Improved	MDR	No	-	MDR	94	MDR	MDR	No	-	Improved	XDR	No	-	273	XDR	No	-	Abscond	XDR	No	-	128	N/A
230	Yes	Improved	MDR	1	No	Improved	MDR	No	-	MDR	119	INH-MONO	N/A
231	Yes	Treatment failure	M/XDR	2	Yes	Improved	RIF-MONO	Yes	MDR	MDR	272	RIF-MONO	MDR	No	-	Treatment failure	XDR	No	-	344	N/A
232	No	Abscond	MDR	2	No	Abscond	MDR	No	-	MDR	21	MDR	Unknown	No	-	Abscond	MDR	No	-	119	N/A
233	No	Improved	M/XDR	3	No	Abscond	MDR	No	-	MDR	199	MDR	MDR	No	-	Abscond	M/XDR	No	-	236	MDR	No	-	Improved	XDR	No	-	185	N/A
234	No	Abscond	M/XDR	3	No	Refused inpt Treatment	MDR	No	-	MDR	183	MDR	Unknown	No	-	Improved	XDR	No	-	489	None	No	-	Abscond	M/XDR	No	-	327	N/A
235	Yes	Transfer to Hosp WC	MDR	1	No	Transfer to Hosp WC	MDR	No	-	MDR	84	MDR	N/A
236	Yes	Treatment failure	M/XDR	2	No	Abscond	MDR	No	-	MDR	170	None	MDR	No	-	Treatment failure	M/XDR	No	-	796	N/A
239	Yes	Abscond	MDR	1	No	Abscond	MDR	No	-	MDR	176	MDR	N/A
240	Yes	Abscond	MDR	2	No	Refused inpt Treatment	MDR	No	-	MDR	6	MDR	MDR	No	-	Abscond	MDR	No	-	158	N/A
241	No	Improved	XDR	1	No	Improved	MDR	No	-	XDR	81	MDR	N/A
242	Yes	Died	M/XDR	1	No	Died	MDR	No	-	M/XDR	696	MDR	N/A
246	No	Abscond	M/XDR	1	No	Abscond	MDR	No	-	M/XDR	737	MDR	N/A
247	No	Refuse Inpt Treatment	MDR	1	No	Refuse Inpt Treatment	MDR	No	-	MDR	107	MDR	N/A
248	Yes	Died	XDR	2	No	Abscond	MDR	No	-	XDR	104	MDR	None	No	-	Died	XDR	No	-	33	N/A
250	Yes	Improved	M/XDR	2	No	Improved	MDR	No	-	MDR	217	MDR	MDR	No	-	Improved	XDR	No	-	210	N/A
252	Yes	Died	M/XDR	3	No	Abscond	MDR	No	-	M/XDR	247	MDR	None	No	-	Improved	XDR	No	-	45	XDR	No	-	Died	XDR	No	-	46	N/A
253	Yes	Died	MDR	4	No	Refused inpt Treatment	MDR	No	-	MDR	4	MDR	None	No	-	Refuse Inpt Treatment	MDR	No	-	28	None	No	-	Abscond	MDR	No	-	82	None	No	-	Died	MDR	No	-	76	N/A
254	Yes	Died	XDR	1	No	Died	MDR	No	-	XDR	699	MDR	N/A
[truncated: 3 more columns]
