# Supplementary material for: Variation in missed doses and reasons for discontinuation of anti-tuberculosis drugs during hospital treatment for drug-resistant tuberculosis in South Africa
Source: PLoS One. 2023 Feb 13;18(2):e0281097. doi: 10.1371/journal.pone.0281097 (PMC9925007; doi:10.1371/journal.pone.0281097)
Supplement: S6 File — (CSV) [file pone.0281097.s006.csv]

StudyNumber	Ageatfirstadmission	Weightatfirstadmission	cxr_scoreat1stadm	race_mod	smoke_ever_mod	subs_ever_mod	edu	hiv_firstadm	adher_PAS	sex	prevtb
1	44	62	6	Mixed Ancestry	Yes	Yes	Primary	0	89	Male	No
2	40	50	0	Mixed Ancestry	Yes	Yes	Secondary	1	78	Male	No
3	20	50	8	Mixed Ancestry	Yes	Yes	Secondary	0	41	Male	No
4	44	44		Mixed Ancestry	Unknown	Unknown	Primary	0	87	Male	Yes
5	26	38		Mixed Ancestry	No	No	Unknown	1	75	Female	Yes
6	36	52		Mixed Ancestry	Unknown	No	Secondary	0	93	Female	Yes
7	33	53	6	Mixed Ancestry	Yes	Yes	Secondary	0	85	Male	Yes
8	28	39		Mixed Ancestry	Yes	Yes	Secondary	0	93	Female	No
9	46	45		Mixed Ancestry	Yes	Yes	Secondary	0	94	Male	Yes
10	17	47		Black	Yes	Yes	Secondary	0	62	Male	No
11	55		5	Mixed Ancestry	Yes	Yes	Primary	0	90	Male	Yes
12	35	50		Mixed Ancestry	Yes	Yes	Secondary	0	78	Male	Yes
13	32	53	6	Mixed Ancestry	Yes	Yes	Secondary	0	91	Female	Yes
14	22	44	7	Mixed Ancestry	Yes	Yes	Primary	0	73	Male	Yes
15	23	35		Black	Unknown	No	Secondary	0	89	Female	Yes
16	37	68	2	Black	Yes	Yes	Secondary	0	87	Male	Yes
17	39	31	5	Mixed Ancestry	Yes	Yes	Primary	1	84	Female	Yes
18	25	38		Mixed Ancestry	Yes	Yes	Secondary	1	83	Female	Yes
19	22	40		Mixed Ancestry	No	No	Primary	0	85	Female	Yes
20	28	70	6	Indian	Yes	Yes	Primary	1	78	Female	Yes
21	34		6	Mixed Ancestry	Yes	No	Primary	0	18	Male	Yes
22	28			Mixed Ancestry	No	Yes	Primary	0	94	Male	Yes
23	39	63		Indian	Yes	Yes	Secondary	0	10	Male	Yes
24	37	46	5	Mixed Ancestry	Yes	Yes	Tertiary	0	87	Female	Yes
25	19	40	7	Mixed Ancestry	Unknown	Yes	Secondary	0	75	Female	Yes
26	45			Mixed Ancestry	Yes	Yes	Primary	0	53	Male	Yes
27	20	36		Mixed Ancestry	Yes	Yes	Secondary	0	91	Male	Yes
28	69	63		Mixed Ancestry	Yes	Yes	Primary	0	83	Male	No
29	42	56	8	Mixed Ancestry	Yes	Yes	Primary	0	65	Male	Yes
30	39	39	7	Mixed Ancestry	Yes	Yes	Secondary	0	75	Female	Yes
31	34	59		Mixed Ancestry	Yes	Yes	Secondary	1	77	Female	Yes
32	30	46		Mixed Ancestry	Yes	No	Primary	1	72	Male	No
33	38	51		Mixed Ancestry	Yes	Yes	Secondary	1	76	Male	Yes
34	29	51	8	Black	No	No	Secondary	0	74	Female	Yes
35	31	60		Black	Yes	No	Primary	1	92	Male	Yes
36	38	45		Black	No	No	Secondary	1	57	Female	Yes
37	48	50		Mixed Ancestry	Yes	Yes	Primary	0		Male	Yes
38	27	49		Mixed Ancestry	Yes	Yes	Secondary	0	77	Male	Yes
39	26	59	4	Mixed Ancestry	Yes	Yes	Secondary	1	95	Female	Yes
40	44	48	5	Mixed Ancestry	Yes	Yes	Secondary	1	87	Male	Yes
41	17	45		Mixed Ancestry	Unknown	Yes	Secondary	1	84	Female	No
42	31	41	11	Black	Unknown	Yes	Primary	0	83	Female	Yes
43	30	48	2	Black	No	Yes	Secondary	1	86	Male	Yes
44	37	69	9	Black	No	No	Tertiary	1	79	Male	Yes
45	35	60		Mixed Ancestry	Yes	Yes	Primary	0	80	Male	Yes
46	50	52	3	Mixed Ancestry	Yes	Yes	Primary	0	68	Male	Yes
47	29	84	2	Black	No	No	Secondary	1	84	Female	Yes
49	40		4	Mixed Ancestry	Yes	Yes	Primary	0		Male	No
50	52	38		Mixed Ancestry	Yes	Yes	Primary	1	83	Female	No
51	64			Mixed Ancestry	No	Yes	Primary	0		Male	Yes
52	32	45	4	Mixed Ancestry	Yes	Yes	Secondary	0	93	Female	No
53	25	54	8	Mixed Ancestry	No	Yes	Secondary	0	86	Male	No
54	25	34	8	Black	No	No	Tertiary	1	50	Female	Yes
55	29	38	9	Mixed Ancestry	Yes	Yes	Secondary	0		Female	Yes
56	22			Mixed Ancestry	No	No	Primary	0	66	Female	Yes
57	26		10	Mixed Ancestry	No	Yes	Secondary	0	91	Female	No
58	44	72	5	Black	No	Yes	Unknown	1		Female	Yes
59	25	37		Mixed Ancestry	Yes	Yes	Secondary	0	91	Female	Yes
60	34	52		Mixed Ancestry	No	No	Secondary	0	86	Male	Yes
61	29	40		Mixed Ancestry	Yes	Yes	Secondary	1	82	Female	Yes
62	56	63	4	Black	No	Yes	Primary	1	84	Female	Yes
63	41			Mixed Ancestry	Yes	Yes	Secondary	0	86	Male	No
64	34	44		Black	No	No	Unknown	1	86	Female	Yes
65	19	39	5	Mixed Ancestry	Yes	Yes	Secondary	0	80	Male	Yes
66	39	58	1	Black	No	Yes	Primary	1	77	Female	Yes
67	31	57		Mixed Ancestry	No	No	Secondary	1	88	Female	No
68	43	50		Mixed Ancestry	Yes	Yes	Secondary	0	90	Male	Yes
69	56	45	8	Mixed Ancestry	Yes	No	Primary	0	80	Male	Yes
70	38	51		Black	No	No	Secondary	1	76	Female	Yes
71	47			Mixed Ancestry	Yes	Yes	Secondary	0	61	Male	No
72	26	45		Black	Yes	Yes	Secondary	1	93	Male	Yes
73	32	47	7	Black	No	Yes	Primary	1		Male	Yes
74	41	35	10	Mixed Ancestry	No	No	Secondary	0	85	Female	Yes
75	29	48		Mixed Ancestry	No	Yes	Secondary	1	100	Female	Yes
76	26	49	5	Black	No	No	Secondary	0	90	Female	No
77	41	55		Mixed Ancestry	Yes	Yes	Secondary	0	78	Male	Yes
78	18	64	3	Mixed Ancestry	Yes	No	Secondary	0	91	Male	Yes
79	45	51	4	Mixed Ancestry	Yes	Yes	Secondary	0	80	Male	Yes
80	27	48		Mixed Ancestry	Yes	Yes	Primary	0	84	Female	No
81	20	37	2	Mixed Ancestry	Yes	Yes	Secondary	0	88	Female	Yes
82	21	54	5	Mixed Ancestry	Yes	Yes	Secondary	0	93	Female	No
83	32	49	6	Mixed Ancestry	No	Yes	Secondary	0	81	Female	Yes
84	22	40	3	Mixed Ancestry	Yes	Yes	Secondary	0	82	Female	Yes
85	36	40	3	Black	No	No	Secondary	1	45	Female	Yes
86	29			Black	Yes	Yes	Primary	1	50	Male	Yes
87	37		5	Mixed Ancestry	Yes	No	Primary	0	88	Male	Yes
88	36	40	6	Black	No	No	Secondary	1	81	Female	Yes
89	35	64		Black	Unknown	Unknown	Secondary	1	88	Female	No
90	34	87	3	Black	No	No	Tertiary	0	89	Female	No
91	17			Black	No	No	Secondary	0	96	Female	No
92	32	51	3	Mixed Ancestry	Yes	Yes	Unknown	0	81	Female	Yes
93	39	64	2	Mixed Ancestry	No	No	Secondary	1	66	Female	Yes
94	39	52		Black	Yes	Yes	Secondary	1		Female	Yes
95	23	44		Black	No	Yes	Secondary	0	84	Male	Yes
96	27	38		Black	No	No	Secondary	1	96	Male	Yes
97	34	57	5	Black	No	No	Unknown	1		Female	Yes
98	38	69		Black	No	Yes	Secondary	1	76	Male	Yes
99	45	54		Black	Yes	No	Secondary	0	49	Male	Yes
100	18	46	6	Mixed Ancestry	Yes	Yes	Secondary	0	68	Male	Yes
101	35	51	4	Black	Yes	Yes	Secondary	1	70	Male	Yes
102	19	63		Mixed Ancestry	No	No	Secondary	0	86	Female	Yes
103	31	65		Black	Yes	Yes	Secondary	1	69	Male	Yes
104	22	34	6	Mixed Ancestry	Yes	No	Secondary	0		Female	No
105	36	54		Mixed Ancestry	No	No	Unknown	0	91	Female	Yes
106	23			Black	No	No	Tertiary	0	92	Female	No
107	20	45	5	Mixed Ancestry	Yes	Yes	Secondary	0	79	Male	Yes
108	20	45		Black	Unknown	Yes	Secondary	0	79	Female	Yes
109	49	48	5	Black	Yes	Yes	Secondary	1	95	Male	Yes
110	44	51	5	Mixed Ancestry	Yes	Yes	Secondary	0	86	Male	No
111	18	55	5	Black	No	Yes	Secondary	0	85	Male	Yes
112	30	63	9	Black	Yes	Yes	Secondary	0		Male	Yes
113	26	48	3	Mixed Ancestry	Yes	Yes	Secondary	0	95	Female	No
114	54	60	4	Mixed Ancestry	Yes	Yes	None	0	90	Male	Yes
115	34	61	2	Mixed Ancestry	No	Yes	Secondary	0	87	Female	Yes
116	45	50		Black	No	No	Unknown	1	100	Male	Yes
117	45	59		Mixed Ancestry	Yes	Yes	Secondary	0	92	Male	No
118	34	49		Black	Unknown	Yes	Primary	0	74	Male	Yes
119	38	47	4	Black	Yes	No	Primary	1	65	Female	Yes
120	35	50		Mixed Ancestry	Yes	No	Primary	1	93	Female	Yes
121	42	67	5	Black	Yes	Yes	Secondary	0	83	Male	No
122	20	41		Mixed Ancestry	Yes	Yes	Primary	0	72	Male	Yes
123	54	35		Mixed Ancestry	Yes	Yes	Secondary	0	69	Female	No
124	53			Mixed Ancestry	Yes	Yes	Secondary	0	46	Male	Yes
125	42	58	4	Black	Yes	Yes	Secondary	1	91	Female	Yes
126	32	54	5	Black	No	No	Secondary	1	83	Female	No
127	44	58	5	Mixed Ancestry	No	No	Unknown	0	85	Male	Yes
128	30	39	5	Mixed Ancestry	Yes	Yes	Primary	1	82	Female	Yes
129	49		6	Mixed Ancestry	Yes	Yes	None	0	84	Female	Yes
130	32	60	3	Mixed Ancestry	Yes	Yes	Primary	1	77	Female	Yes
131	39	46		Mixed Ancestry	Yes	Yes	Secondary	0	89	Male	Yes
132	31	43		Mixed Ancestry	Yes	Yes	Primary	1	93	Male	No
133	50	52		Mixed Ancestry	Yes	Yes	Primary	1	81	Male	No
134	27	77		Mixed Ancestry	Yes	No	Secondary	0	89	Female	No
135	43	56		Mixed Ancestry	No	No	Primary	0	97	Male	No
136	31	41		Mixed Ancestry	Yes	Yes	Secondary	1	70	Male	Yes
137	24	40	6	Black	No	No	Secondary	1	88	Female	Yes
138	27	53		Black	Yes	No	Secondary	0	82	Male	Yes
139	23	59	0	Black	Yes	Yes	Secondary	0	88	Male	No
140	46	58		Mixed Ancestry	Yes	Yes	Secondary	0	62	Male	Yes
141	36	46		Mixed Ancestry	Yes	Yes	Primary	0	84	Male	No
142	51	75	0	Indian	Yes	Yes	Secondary	0	76	Male	No
143	34	48	5	Mixed Ancestry	Yes	Yes	Primary	1	88	Male	Yes
144	22	54	4	Black	Yes	No	Secondary	1	66	Female	No
145	47	41	0	Mixed Ancestry	Yes	Yes	Primary	0	60	Male	No
146	28	53		Black	Yes	Yes	Secondary	1	81	Male	Yes
147	24	57	2	Mixed Ancestry	Yes	Yes	Primary	0	74	Male	Yes
148	50	65		Mixed Ancestry	No	No	Unknown	0	79	Female	Yes
149	35	48		Mixed Ancestry	No	No	Secondary	1	94	Female	Yes
150	45	46	4	Black	Yes	Yes	None	1	93	Male	No
151	33	52	1	Black	No	Yes	Secondary	1	87	Female	Yes
152	22	51	0	Black	Yes	Yes	Secondary	0	84	Female	No
153	29			Black	Yes	Yes	Secondary	0	90	Male	Yes
154	27	37		Mixed Ancestry	No	Yes	Unknown	0	81	Female	No
155	28	50		Black	No	No	Secondary	0	92	Male	Yes
156	48	55		Mixed Ancestry	Yes	Yes	Secondary	0		Female	Yes
157	25	52		Black	Yes	Yes	Secondary	0	95	Male	Yes
158	33	46	8	Black	Unknown	Yes	Primary	0	90	Male	Yes
159	28			Black	No	No	Secondary	1	82	Female	No
160	39	60		Black	Yes	Yes	Secondary	1	78	Male	No
161	38	57	2	Black	No	No	Tertiary	1	91	Female	Yes
162	28	56	0	Black	No	No	Secondary	0	84	Male	No
163	36	74		Black	Yes	Yes	Secondary	1	68	Male	Yes
164	37	38	0	Mixed Ancestry	No	No	Secondary	1	73	Male	Yes
165	36			Mixed Ancestry	Yes	Yes	Secondary	0	81	Male	Yes
166	42	47	5	Black	No	No	None	1	57	Female	Yes
167	26	51	7	Black	No	No	Secondary	0	90	Female	Yes
168	32	50		Black	Unknown	Unknown	Unknown	1	66	Male	Yes
169	30	54		Black	No	Yes	Secondary	0	81	Male	Yes
171	37	48		Black	Yes	Yes	Unknown	1	43	Male	Yes
172	25			Mixed Ancestry	Yes	No	Primary	1	89	Female	Yes
173	24	76	3	Mixed Ancestry	Yes	Yes	Secondary	1	75	Female	Yes
174	46	45		Black	No	Yes	Unknown	1	72	Male	Yes
175	30	66	4	Black	Yes	Yes	Secondary	1		Male	No
176	32	75		Mixed Ancestry	No	Yes	Tertiary	0	95	Male	Yes
177	25	65	7	Mixed Ancestry	Yes	Yes	Secondary	0	83	Male	No
178	23	56		Mixed Ancestry	Yes	Yes	Primary	0	86	Male	Yes
179	25			Black	Yes	Yes	Secondary	1	92	Female	Yes
180	42	43	3	Mixed Ancestry	No	Yes	Primary	0	75	Female	Yes
181	28	57		Mixed Ancestry	Yes	Yes	Secondary	0	97	Male	No
182	42	52	2	Mixed Ancestry	Yes	Yes	None	1	82	Male	Yes
183	40	55	3	Mixed Ancestry	Yes	Yes	Primary	0	86	Male	No
184	48	45	4	Mixed Ancestry	Yes	Yes	Primary	0	75	Male	Yes
185	40	56		Black	Yes	Yes	Secondary	0	94	Male	Yes
186	40	58	7	Black	Yes	Yes	Primary	0	97	Male	Yes
187	28	62		Black	Yes	Yes	Secondary	0	95	Male	No
188	19	39		Mixed Ancestry	No	No	Secondary	0	88	Female	No
189	57	48	10	Black	Yes	Yes	Secondary	0	94	Male	Yes
190	24	53		Mixed Ancestry	Yes	Yes	Secondary	0	82	Male	Yes
191	32	61	6	Black	No	Yes	Secondary	1	91	Female	Yes
192	22	36	6	Black	No	No	Secondary	1	83	Female	Yes
193	41	66	4	Indian	Yes	Yes	Tertiary	0	76	Male	Yes
194	50	46	5	Black	No	Yes	Secondary	1	90	Male	Yes
195	38	45	12	Indian	Yes	Yes	Primary	0		Female	No
196	40	50	4	Mixed Ancestry	Yes	No	Primary	0		Female	Yes
197	28			Mixed Ancestry	Yes	Yes	Secondary	0	85	Male	Yes
198	43	53	4	Mixed Ancestry	Yes	Yes	Secondary	0	93	Male	Yes
199	29	60		Black	No	No	Primary	1	86	Female	Yes
200	43	44		Black	No	No	Secondary	1	83	Male	Yes
201	25	58	6	Black	Yes	Yes	Secondary	1	76	Male	Yes
202	21	50	8	Black	Yes	Yes	Secondary	1	62	Male	Yes
203	30	51	6	Black	No	Yes	Secondary	1	89	Male	Yes
204	40	34		Mixed Ancestry	Yes	Yes	Secondary	0	65	Male	Yes
205	34	75		Black	No	No	None	1	74	Male	Yes
206	23	47		Black	No	No	Secondary	1	96	Female	No
207	34	49	8	Mixed Ancestry	Yes	Yes	Secondary	0	93	Male	Yes
208	34	47	7	Black	No	Yes	Secondary	1	84	Female	Yes
209	36	42	1	Indian	Yes	Yes	Secondary	0		Female	No
210	40	44	4	Mixed Ancestry	Yes	Yes	Primary	0	78	Male	Yes
211	21	45	11	Black	No	Yes	Secondary	0	96	Female	No
212	40	50		Mixed Ancestry	Yes	Yes	Primary	0	91	Male	Yes
213	43	57	7	Mixed Ancestry	Yes	Yes	Primary	0	89	Female	Yes
214	24	45		Black	Yes	Yes	Secondary	1		Female	Yes
215	20	43		Mixed Ancestry	No	No	Secondary	0	84	Female	Yes
216	47	52		Mixed Ancestry	No	No	Primary	1	100	Male	No
217	44	40		Mixed Ancestry	Yes	Yes	Primary	1	92	Female	Yes
219	43	36	6	Mixed Ancestry	Yes	Yes	Secondary	0		Male	Yes
220	22	39	7	Black	No	No	Secondary	0	87	Male	No
221	34	48		Black	Yes	Yes	Secondary	0	68	Male	Yes
222	31	49	4	Mixed Ancestry	Yes	Yes	Secondary	0	91	Male	Yes
224	38	46		Black	No	No	None	1	92	Male	No
225	52	62	10	Black	No	Yes	Secondary	1	68	Male	Yes
227	17	42		Mixed Ancestry	No	Yes	Secondary	0	83	Female	Yes
228	46	47		Black	No	Yes	Secondary	1	94	Female	No
229	59	44	5	Mixed Ancestry	Yes	Yes	Primary	0	88	Female	No
230	56	34	8	Mixed Ancestry	Yes	Yes	Primary	0		Female	Yes
231	42	42		Mixed Ancestry	Yes	No	Primary	0		Male	No
232	26	35	4	Mixed Ancestry	Yes	Yes	Secondary	0		Female	Yes
233	37	31	8	Black	Yes	Yes	Secondary	1	96	Female	Yes
234	34	45		Black	No	Yes	Primary	1	87	Female	Yes
235	26	49		Black	No	Yes	Secondary	1		Female	Yes
236	50	39		Mixed Ancestry	No	Yes	Primary	0	87	Male	Yes
239	39	28	4	Mixed Ancestry	Yes	Yes	Unknown	1		Female	Yes
240	22	50		Mixed Ancestry	No	No	Secondary	1		Female	Yes
241	27	46	2	Mixed Ancestry	Yes	Yes	Secondary	1	93	Female	Yes
242	34	51		Mixed Ancestry	Yes	Yes	Tertiary	0	90	Male	Yes
246	49	57		Mixed Ancestry	Yes	Yes	Primary	0	88	Male	Yes
247	52	46		Mixed Ancestry	No	No	Unknown	0		Female	Yes
248	50	49	8	Black	Yes	No	Secondary	1	93	Male	Yes
250	30	49	6	Black	No	No	Secondary	1	78	Female	No
252	69	41		Black	No	No	Unknown	0	89	Female	Yes
253	23	49	6	Mixed Ancestry	Yes	Yes	Secondary	0		Female	Yes
254	51	53	0	Mixed Ancestry	No	Yes	Secondary	0	76	Male	Yes
