# Supplementary material for: Variation in missed doses and reasons for discontinuation of anti-tuberculosis drugs during hospital treatment for drug-resistant tuberculosis in South Africa
Source: PLoS One. 2023 Feb 13;18(2):e0281097. doi: 10.1371/journal.pone.0281097 (PMC9925007; doi:10.1371/journal.pone.0281097)
Supplement: S7 File — (CSV) [file pone.0281097.s007.csv]

Study Number	Drug	Reason for stop treatment
1	Capreomycin	Abscond / refuse Rx
1	Capreomycin	Treatment Failure
1	Clarithromycin	Treatment Failure
1	Dapsone	Continued as OPD treatment
1	Dapsone	Treatment Failure
1	Ethambutol	Continued as OPD treatment
1	Ethambutol	Transfer
1	Ethambutol	Treatment Failure
1	Ethionamide	Transfer
1	Ethionamide	Treatment Failure
1	Isoniazid	Treatment Failure
1	Kanamycin	Transfer
1	Ofloxacin	Continued as OPD treatment
1	Ofloxacin	Transfer
1	Ofloxacin	Treatment Failure
1	PAS	Continued as OPD treatment
1	PAS	Treatment Failure
1	Pyrazinamide	Continued as OPD treatment
1	Pyrazinamide	Transfer
1	Pyrazinamide	Treatment Failure
1	Terizidone	Continued as OPD treatment
1	Terizidone	Treatment Failure
2	Bedaquiline	Abscond / refuse Rx
2	Capreomycin	Abscond / refuse Rx
2	Clofazimine	Unknown
2	Ethambutol	Abscond / refuse Rx
2	Ethionamide	Abscond / refuse Rx
2	Levofloxacin	Abscond / refuse Rx
2	Moxifloxacin	Changed medication
2	PAS	Abscond / refuse Rx
2	Pyrazinamide	Abscond / refuse Rx
2	Terizidone	Abscond / refuse Rx
3	Capreomycin	Treatment Failure
3	Ethambutol	Treatment Failure
3	Ethionamide	Treatment Failure
3	Kanamycin	Treatment Failure
3	Ofloxacin	Treatment Failure
3	PAS	Abscond / refuse Rx
3	Pyrazinamide	Treatment Failure
3	Terizidone	Treatment Failure
4	Amoxil	Course of treatment complete
4	Augmentin	Course of treatment complete
4	Capreomycin	Changed medication
4	Clarithromycin	Unknown
4	Ethambutol	Continued as OPD treatment
4	Ethionamide	Continued as OPD treatment
4	Isoniazid	Unknown
4	Kanamycin	Continued as OPD treatment
4	Ofloxacin	Continued as OPD treatment
4	Ofloxacin	Unknown
4	PAS	Continued as OPD treatment
4	Pyrazinamide	Continued as OPD treatment
4	Pyrazinamide	Continued as OPD treatment
4	Terizidone	Continued as OPD treatment
4	Terizidone	Continued as OPD treatment
5	Capreomycin	Adverse Drug Reaction
5	Ethambutol	Adverse Drug Reaction
5	Ethionamide	Death
5	Kanamycin	Treatment Failure
5	Ofloxacin	Death
5	PAS	Death
5	Pyrazinamide	Death
5	Terizidone	Death
6	Capreomycin	Adverse Drug Reaction
6	Capreomycin	Course of treatment complete
6	Clofazimine	Continued as OPD treatment
6	Ethionamide	Continued as OPD treatment
6	Isoniazid	Course of treatment complete
6	Kanamycin	Treatment Failure
6	Levofloxacin	Changed medication
6	Moxifloxacin	Changed medication
6	Moxifloxacin	Continued as OPD treatment
6	PAS	Continued as OPD treatment
6	Pyrazinamide	Continued as OPD treatment
6	Pyrazinamide	Treatment Failure
6	Rifafour	Course of treatment complete
6	Terizidone	Continued as OPD treatment
7	Capreomycin	Abscond / refuse Rx
7	Capreomycin	Abscond / refuse Rx
7	Capreomycin	Abscond / refuse Rx
7	Capreomycin	Continued as OPD treatment
7	Capreomycin	Treatment Interruption
7	Clofazimine	Abscond / refuse Rx
7	Clofazimine	Abscond / refuse Rx
7	Clofazimine	Continued as OPD treatment
7	Ethambutol	Abscond / refuse Rx
7	Ethambutol	Continued as OPD treatment
7	Ethambutol	Unknown
7	Ethionamide	Abscond / refuse Rx
7	Ethionamide	Abscond / refuse Rx
7	Ethionamide	Abscond / refuse Rx
7	Ethionamide	Continued as OPD treatment
7	Ethionamide	Continued as OPD treatment
7	Isoniazid	Abscond / refuse Rx
7	Isoniazid	Continued as OPD treatment
7	Isoniazid	Unknown
7	Moxifloxacin	Abscond / refuse Rx
7	Moxifloxacin	Abscond / refuse Rx
7	Moxifloxacin	Continued as OPD treatment
7	Moxifloxacin	Continued as OPD treatment
7	Ofloxacin	Abscond / refuse Rx
7	PAS	Abscond / refuse Rx
7	PAS	Abscond / refuse Rx
7	PAS	Abscond / refuse Rx
7	PAS	Continued as OPD treatment
7	PAS	Continued as OPD treatment
7	Pyrazinamide	Abscond / refuse Rx
7	Pyrazinamide	Abscond / refuse Rx
7	Pyrazinamide	Abscond / refuse Rx
7	Pyrazinamide	Continued as OPD treatment
7	Terizidone	Abscond / refuse Rx
7	Terizidone	Abscond / refuse Rx
7	Terizidone	Abscond / refuse Rx
7	Terizidone	Continued as OPD treatment
7	Terizidone	Continued as OPD treatment
8	Bedaquiline	Adverse Drug Reaction
8	Bedaquiline	Continued as OPD treatment
8	Capreomycin	Treatment Failure
8	Capreomycin	Treatment Interruption
8	Clarithromycin	Treatment Failure
8	Clofazimine	Treatment Failure
8	Clofazimine	Treatment Interruption
8	Ethambutol	Continued as OPD treatment
8	Ethambutol	Course of treatment complete
8	Ethambutol	Treatment Failure
8	Ethambutol	Treatment Interruption
8	Ethionamide	Continued as OPD treatment
8	Ethionamide	Treatment Failure
8	Ethionamide	Treatment Interruption
8	Isoniazid	Continued as OPD treatment
8	Isoniazid	Course of treatment complete
8	Isoniazid	Treatment Failure
8	Isoniazid	Treatment Interruption
8	Linezolid	Adverse Drug Reaction
8	Linezolid	Continued as OPD treatment
8	Moxifloxacin	Continued as OPD treatment
8	Moxifloxacin	Course of treatment complete
8	Moxifloxacin	Treatment Failure
8	Moxifloxacin	Treatment Interruption
8	PAS	Treatment Failure
8	PAS	Treatment Interruption
8	Pyrazinamide	Continued as OPD treatment
8	Pyrazinamide	Course of treatment complete
8	Pyrazinamide	Treatment Failure
8	Pyrazinamide	Treatment Interruption
8	Terizidone	Continued as OPD treatment
8	Terizidone	Course of treatment complete
8	Terizidone	Treatment Failure
8	Terizidone	Treatment Interruption
9	Capreomycin	Adverse Drug Reaction
9	Capreomycin	Treatment Failure
9	Clarithromycin	Treatment Failure
9	Dapsone	Treatment Failure
9	Ethambutol	Transfer
9	Ethambutol	Treatment Failure
9	Ethionamide	Transfer
9	Ethionamide	Treatment Failure
9	Kanamycin	Transfer
9	Ofloxacin	Transfer
9	Ofloxacin	Treatment Failure
9	PAS	Treatment Failure
9	Pyrazinamide	Transfer
9	Pyrazinamide	Treatment Failure
9	Terizidone	Treatment Failure
10	Capreomycin	Continued as OPD treatment
10	Capreomycin	Death
10	Clofazimine	Death
10	Ethambutol	Continued as OPD treatment
10	Ethionamide	Continued as OPD treatment
10	Ethionamide	Continued as OPD treatment
10	Ethionamide	Continued as OPD treatment
10	Ethionamide	Death
10	Kanamycin	Continued as OPD treatment
10	Kanamycin	Continued as OPD treatment
10	Moxifloxacin	Continued as OPD treatment
10	Moxifloxacin	Death
10	Ofloxacin	Continued as OPD treatment
10	Ofloxacin	Continued as OPD treatment
10	PAS	Continued as OPD treatment
10	PAS	Death
10	Pyrazinamide	Continued as OPD treatment
10	Pyrazinamide	Continued as OPD treatment
10	Pyrazinamide	Continued as OPD treatment
10	Pyrazinamide	Death
10	Terizidone	Continued as OPD treatment
10	Terizidone	Continued as OPD treatment
10	Terizidone	Continued as OPD treatment
10	Terizidone	Death
11	Augmentin	Abscond / refuse Rx
11	Augmentin	Course of treatment complete
11	Capreomycin	Abscond / refuse Rx
11	Capreomycin	Abscond / refuse Rx
11	Clofazimine	Abscond / refuse Rx
11	Ethambutol	Abscond / refuse Rx
11	Ethambutol	Abscond / refuse Rx
11	Ethambutol	Abscond / refuse Rx
11	Ethionamide	Abscond / refuse Rx
11	Ethionamide	Abscond / refuse Rx
11	Ethionamide	Abscond / refuse Rx
11	Ethionamide	Abscond / refuse Rx
11	Ethionamide	Continued as OPD treatment
11	Isoniazid	Abscond / refuse Rx
11	Kanamycin	Abscond / refuse Rx
11	Kanamycin	Abscond / refuse Rx
11	Kanamycin	Adverse Drug Reaction
11	Moxifloxacin	Abscond / refuse Rx
11	Moxifloxacin	Abscond / refuse Rx
11	Moxifloxacin	Abscond / refuse Rx
11	Ofloxacin	Abscond / refuse Rx
11	Ofloxacin	Continued as OPD treatment
11	PAS	Abscond / refuse Rx
11	PAS	Abscond / refuse Rx
11	Pyrazinamide	Abscond / refuse Rx
11	Pyrazinamide	Abscond / refuse Rx
11	Pyrazinamide	Abscond / refuse Rx
11	Pyrazinamide	Abscond / refuse Rx
11	Pyrazinamide	Continued as OPD treatment
11	Terizidone	Abscond / refuse Rx
11	Terizidone	Abscond / refuse Rx
11	Terizidone	Abscond / refuse Rx
11	Terizidone	Abscond / refuse Rx
11	Terizidone	Continued as OPD treatment
12	Capreomycin	Abscond / refuse Rx
12	Ethambutol	Abscond / refuse Rx
12	Ethambutol	Abscond / refuse Rx
12	Ethambutol	Abscond / refuse Rx
12	Ethionamide	Abscond / refuse Rx
12	Ethionamide	Abscond / refuse Rx
12	Ethionamide	Abscond / refuse Rx
12	Ethionamide	Continued as OPD treatment
12	Isoniazid	Adverse Drug Reaction
12	Kanamycin	Abscond / refuse Rx
12	Kanamycin	Continued as OPD treatment
12	Moxifloxacin	Abscond / refuse Rx
12	Moxifloxacin	Abscond / refuse Rx
12	Ofloxacin	Abscond / refuse Rx
12	Ofloxacin	Continued as OPD treatment
12	PAS	Abscond / refuse Rx
12	PAS	Abscond / refuse Rx
12	Pyrazinamide	Abscond / refuse Rx
12	Pyrazinamide	Abscond / refuse Rx
12	Pyrazinamide	Abscond / refuse Rx
12	Pyrazinamide	Continued as OPD treatment
12	Terizidone	Abscond / refuse Rx
12	Terizidone	Abscond / refuse Rx
12	Terizidone	Continued as OPD treatment
13	Augmentin	Treatment Failure
13	Capreomycin	Adverse Drug Reaction
13	Capreomycin	Treatment Failure
13	Capreomycin	Treatment Interruption
13	Clofazimine	Treatment Failure
13	Dapsone	Treatment Failure
13	Ethambutol	Treatment Failure
13	Ethionamide	Adverse Drug Reaction
13	Isoniazid	Treatment Failure
13	Kanamycin	Treatment Failure
13	Moxifloxacin	Treatment Failure
13	Ofloxacin	Changed medication
13	PAS	Treatment Failure
13	Pyrazinamide	Adverse Drug Reaction
13	Pyrazinamide	Treatment Failure
13	Terizidone	Treatment Failure
14	Capreomycin	Treatment Failure
14	Dapsone	Treatment Failure
14	Ethambutol	Changed medication
14	Ethionamide	Treatment Failure
14	Ofloxacin	Treatment Failure
14	PAS	Abscond / refuse Rx
14	PAS	Treatment Failure
14	Pyrazinamide	Changed medication
14	Terizidone	Treatment Failure
15	Amoxil	Course of treatment complete
15	Augmentin	Adverse Drug Reaction
15	Augmentin	Course of treatment complete
15	Augmentin	Other reason
15	Capreomycin	Adverse Drug Reaction
15	Clofazimine	Adverse Drug Reaction
15	Clofazimine	Treatment Failure
15	Ethambutol	Continued as OPD treatment
15	Ethambutol	Unknown
15	Ethionamide	Adverse Drug Reaction
15	Isoniazid	Treatment Failure
15	Moxifloxacin	Continued as OPD treatment
15	PAS	Treatment Failure
15	Pyrazinamide	Continued as OPD treatment
15	Terizidone	Adverse Drug Reaction
15	Terizidone	Continued as OPD treatment
15	Terizidone	Unknown
16	Bedaquiline	Course of treatment complete
16	Capreomycin	Course of treatment complete
16	Clofazimine	Changed medication
16	Clofazimine	Continued as OPD treatment
16	Ethambutol	Continued as OPD treatment
16	Ethionamide	Adverse Drug Reaction
16	Isoniazid	Changed medication
16	Isoniazid	Continued as OPD treatment
16	Levofloxacin	Changed medication
16	Linezolid	Adverse Drug Reaction
16	Linezolid	Adverse Drug Reaction
16	Moxifloxacin	Continued as OPD treatment
16	PAS	Changed medication
16	PAS	Continued as OPD treatment
16	Pyrazinamide	Changed medication
16	Pyrazinamide	Continued as OPD treatment
16	Terizidone	Changed medication
16	Terizidone	Continued as OPD treatment
17	Capreomycin	Adverse Drug Reaction
17	Capreomycin	Adverse Drug Reaction
17	Capreomycin	Death
17	Clarithromycin	Continued as OPD treatment
17	Clarithromycin	Transfer
17	Clofazimine	Death
17	Dapsone	Continued as OPD treatment
17	Dapsone	Transfer
17	Ethambutol	Continued as OPD treatment
17	Ethambutol	Death
17	Ethionamide	Continued as OPD treatment
17	Ethionamide	Continued as OPD treatment
17	Ethionamide	Death
17	Isoniazid	Course of treatment complete
17	Kanamycin	Continued as OPD treatment
17	Moxifloxacin	Continued as OPD treatment
17	Moxifloxacin	Death
17	Moxifloxacin	Transfer
17	Ofloxacin	Changed medication
17	Ofloxacin	Continued as OPD treatment
17	PAS	Continued as OPD treatment
17	PAS	Death
17	PAS	Transfer
17	Pyrazinamide	Continued as OPD treatment
17	Pyrazinamide	Death
17	Rifafour	Continued as OPD treatment
17	Rifafour	Transfer
17	Terizidone	Continued as OPD treatment
17	Terizidone	Death
17	Terizidone	Transfer
18	Capreomycin	Treatment Failure
18	Ethambutol	Treatment Failure
18	Ethambutol	Treatment Interruption
18	Ethionamide	Treatment Failure
18	Ethionamide	Treatment Interruption
18	Isoniazid	Treatment Failure
18	Kanamycin	Changed medication
18	Kanamycin	Treatment Interruption
18	Ofloxacin	Treatment Failure
18	Ofloxacin	Treatment Interruption
18	PAS	Treatment Failure
18	Pyrazinamide	Treatment Failure
18	Pyrazinamide	Treatment Interruption
18	Terizidone	Treatment Failure
19	Amikacin	Changed medication
19	Amoxil	Course of treatment complete
19	Augmentin	Course of treatment complete
19	Capreomycin	Abscond / refuse Rx
19	Capreomycin	Granted leave
19	Dapsone	Abscond / refuse Rx
19	Dapsone	Granted leave
19	Ethambutol	Abscond / refuse Rx
19	Ethambutol	Continued as OPD treatment
19	Ethambutol	Granted leave
19	Ethionamide	Abscond / refuse Rx
19	Ethionamide	Continued as OPD treatment
19	Ethionamide	Granted leave
19	Isoniazid	Adverse Drug Reaction
19	Kanamycin	Continued as OPD treatment
19	Ofloxacin	Abscond / refuse Rx
19	Ofloxacin	Continued as OPD treatment
19	Ofloxacin	Granted leave
19	PAS	Abscond / refuse Rx
19	PAS	Granted leave
19	Pyrazinamide	Abscond / refuse Rx
19	Pyrazinamide	Continued as OPD treatment
19	Pyrazinamide	Granted leave
19	Terizidone	Abscond / refuse Rx
19	Terizidone	Granted leave
20	Capreomycin	Treatment Failure
20	Clofazimine	Treatment Failure
20	Ethambutol	Adverse Drug Reaction
20	Ethionamide	Adverse Drug Reaction
20	Ethionamide	Adverse Drug Reaction
20	Isoniazid	Death
20	Kanamycin	Treatment Failure
20	Moxifloxacin	Death
20	Ofloxacin	Changed medication
20	PAS	Treatment Failure
20	Pyrazinamide	Death
20	Terizidone	Death
21	Amoxil	Treatment Failure
21	Augmentin	Treatment Failure
21	Capreomycin	Unknown
21	Ethambutol	Death
21	Ethionamide	Abscond / refuse Rx
21	Ethionamide	Abscond / refuse Rx
21	Ethionamide	Abscond / refuse Rx
21	Ethionamide	Adverse Drug Reaction
21	PAS	Abscond / refuse Rx
21	PAS	Abscond / refuse Rx
21	PAS	Abscond / refuse Rx
21	Pyrazinamide	Death
21	Terizidone	Treatment Failure
22	Capreomycin	Adverse Drug Reaction
22	Capreomycin	Treatment Failure
22	Dapsone	Other reason
22	Ethambutol	Continued as OPD treatment
22	Ethambutol	Treatment Failure
22	Ethionamide	Other reason
22	Isoniazid	Adverse Drug Reaction
22	Kanamycin	Continued as OPD treatment
22	Moxifloxacin	Treatment Failure
22	Ofloxacin	Changed medication
22	Ofloxacin	Continued as OPD treatment
22	PAS	Other reason
22	Pyrazinamide	Continued as OPD treatment
22	Pyrazinamide	Treatment Failure
22	Terizidone	Continued as OPD treatment
22	Terizidone	Treatment Failure
23	Capreomycin	Abscond / refuse Rx
23	Capreomycin	Death
23	Clofazimine	Abscond / refuse Rx
23	Clofazimine	Death
23	Ethambutol	Adverse Drug Reaction
23	Ethambutol	Course of treatment complete
23	Ethambutol	Unknown
23	Ethionamide	Adverse Drug Reaction
23	Ethionamide	Continued as OPD treatment
23	Ethionamide	Course of treatment complete
23	Isoniazid	Abscond / refuse Rx
23	Isoniazid	Death
23	Kanamycin	Continued as OPD treatment
23	Kanamycin	Course of treatment complete
23	Moxifloxacin	Abscond / refuse Rx
23	Moxifloxacin	Continued as OPD treatment
23	Moxifloxacin	Treatment Failure
23	PAS	Abscond / refuse Rx
23	PAS	Unknown
23	Pyrazinamide	Abscond / refuse Rx
23	Pyrazinamide	Continued as OPD treatment
23	Pyrazinamide	Death
23	Terizidone	Abscond / refuse Rx
23	Terizidone	Treatment Failure
24	Amoxil	Continued as OPD treatment
24	Augmentin	Continued as OPD treatment
24	Azithromycin	Continued as OPD treatment
24	Capreomycin	Continued as OPD treatment
24	Dapsone	Adverse Drug Reaction
24	Ethionamide	Continued as OPD treatment
24	Isoniazid	Unknown
24	Kanamycin	Continued as OPD treatment
24	Ofloxacin	Continued as OPD treatment
24	Ofloxacin	Continued as OPD treatment
24	PAS	Continued as OPD treatment
24	Pyrazinamide	Continued as OPD treatment
24	Pyrazinamide	Continued as OPD treatment
24	Terizidone	Continued as OPD treatment
24	Terizidone	Continued as OPD treatment
25	Bedaquiline	Treatment continued beyond sensor date
25	Clofazimine	Changed medication
25	Ethambutol	Changed medication
25	Ethambutol	Continued as OPD treatment
25	Ethionamide	Changed medication
25	Ethionamide	Continued as OPD treatment
25	Ethionamide	Continued as OPD treatment
25	Kanamycin	Continued as OPD treatment
25	Kanamycin	Continued as OPD treatment
25	Linezolid	Treatment continued beyond sensor date
25	Moxifloxacin	Changed medication
25	Moxifloxacin	Continued as OPD treatment
25	Ofloxacin	Continued as OPD treatment
25	PAS	Changed medication
25	Pyrazinamide	Changed medication
25	Pyrazinamide	Continued as OPD treatment
25	Pyrazinamide	Continued as OPD treatment
25	Terizidone	Changed medication
25	Terizidone	Continued as OPD treatment
26	Capreomycin	Treatment Failure
26	Dapsone	Treatment Failure
26	Ethambutol	Continued as OPD treatment
26	Ethambutol	Treatment Failure
26	Ethionamide	Continued as OPD treatment
26	Ethionamide	Treatment Failure
26	Ethionamide	Unknown
26	Isoniazid	Treatment Failure
26	Kanamycin	Continued as OPD treatment
26	Kanamycin	Treatment Failure
26	Ofloxacin	Continued as OPD treatment
26	Ofloxacin	Treatment Failure
26	PAS	Abscond / refuse Rx
26	PAS	Treatment Failure
26	Pyrazinamide	Continued as OPD treatment
26	Pyrazinamide	Treatment Failure
26	Terizidone	Treatment Failure
27	Capreomycin	Treatment Failure
27	Ethambutol	Treatment Failure
27	Ethambutol	Unknown
27	Ethionamide	Continued as OPD treatment
27	Ethionamide	Treatment Failure
27	Kanamycin	Continued as OPD treatment
27	Ofloxacin	Continued as OPD treatment
27	Ofloxacin	Treatment Failure
27	PAS	Treatment Failure
27	Pyrazinamide	Continued as OPD treatment
27	Pyrazinamide	Treatment Failure
27	Terizidone	Continued as OPD treatment
27	Terizidone	Treatment Failure
28	Capreomycin	Unknown
28	Clofazimine	Treatment Failure
28	Ethambutol	Treatment Failure
28	Ethionamide	Treatment Failure
28	Isoniazid	Treatment Failure
28	Moxifloxacin	Treatment Failure
28	PAS	Treatment Failure
28	Pyrazinamide	Treatment Failure
28	Terizidone	Treatment Failure
29	Capreomycin	Adverse Drug Reaction
29	Capreomycin	Unknown
29	PAS	Unknown
30	Capreomycin	Abscond / refuse Rx
30	Capreomycin	Adverse Drug Reaction
30	Capreomycin	Course of treatment complete
30	Clarithromycin	Abscond / refuse Rx
30	Clarithromycin	Adverse Drug Reaction
30	Clofazimine	Abscond / refuse Rx
30	Clofazimine	Treatment Failure
30	Ethambutol	Abscond / refuse Rx
30	Ethambutol	Adverse Drug Reaction
30	Ethionamide	Abscond / refuse Rx
30	Ethionamide	Adverse Drug Reaction
30	Isoniazid	Abscond / refuse Rx
30	Isoniazid	Adverse Drug Reaction
30	Isoniazid	Treatment Failure
30	Moxifloxacin	Abscond / refuse Rx
30	Moxifloxacin	Adverse Drug Reaction
30	Moxifloxacin	Treatment Failure
30	Ofloxacin	Changed medication
30	PAS	Abscond / refuse Rx
30	PAS	Adverse Drug Reaction
30	PAS	Course of treatment complete
30	Pyrazinamide	Abscond / refuse Rx
30	Pyrazinamide	Adverse Drug Reaction
30	Pyrazinamide	Treatment Failure
30	Terizidone	Abscond / refuse Rx
30	Terizidone	Adverse Drug Reaction
30	Terizidone	Treatment Failure
31	Amoxil	Course of treatment complete
31	Augmentin	Treatment Failure
31	Capreomycin	Adverse Drug Reaction
31	Clofazimine	Treatment Failure
31	Ethambutol	Treatment Failure
31	Ethionamide	Treatment Failure
31	Isoniazid	Treatment Failure
31	Moxifloxacin	Treatment Failure
31	PAS	Treatment Failure
31	Pyrazinamide	Treatment Failure
31	Terizidone	Treatment Failure
32	Augmentin	Death
32	Augmentin	Treatment Failure
32	Capreomycin	Treatment Failure
32	Clofazimine	Death
32	Clofazimine	Treatment Failure
32	Ethambutol	Death
32	Ethambutol	Treatment Failure
32	Ethionamide	Death
32	Ethionamide	Treatment Failure
32	Moxifloxacin	Death
32	Moxifloxacin	Treatment Failure
32	Ofloxacin	Changed medication
32	PAS	Treatment Failure
32	Pyrazinamide	Death
32	Pyrazinamide	Treatment Failure
32	Terizidone	Death
32	Terizidone	Treatment Failure
33	Capreomycin	Adverse Drug Reaction
33	Clofazimine	Death
33	Clofazimine	Other reason
33	Ethionamide	Continued as OPD treatment
33	Ethionamide	Death
33	Ethionamide	Other reason
33	Kanamycin	Continued as OPD treatment
33	Moxifloxacin	Continued as OPD treatment
33	Moxifloxacin	Death
33	Moxifloxacin	Other reason
33	PAS	Death
33	PAS	Other reason
33	Pyrazinamide	Continued as OPD treatment
33	Pyrazinamide	Death
33	Pyrazinamide	Other reason
33	Terizidone	Continued as OPD treatment
33	Terizidone	Other reason
34	Amoxil	Course of treatment complete
34	Augmentin	Course of treatment complete
34	Capreomycin	Abscond / refuse Rx
34	Capreomycin	Granted leave
34	Ethambutol	Abscond / refuse Rx
34	Ethambutol	Granted leave
34	Ethionamide	Abscond / refuse Rx
34	Ethionamide	Granted leave
34	Isoniazid	Abscond / refuse Rx
34	Isoniazid	Granted leave
34	Ofloxacin	Abscond / refuse Rx
34	Ofloxacin	Granted leave
34	PAS	Abscond / refuse Rx
34	PAS	Granted leave
34	Pyrazinamide	Abscond / refuse Rx
34	Pyrazinamide	Granted leave
34	Terizidone	Abscond / refuse Rx
34	Terizidone	Granted leave
35	Capreomycin	Adverse Drug Reaction
35	Capreomycin	Other reason
35	Capreomycin	Treatment Failure
35	Dapsone	Adverse Drug Reaction
35	Ethambutol	Unknown
35	Ethionamide	Treatment Failure
35	Isoniazid	Adverse Drug Reaction
35	Ofloxacin	Treatment Failure
35	Ofloxacin	Unknown
35	PAS	Treatment Failure
35	Pyrazinamide	Adverse Drug Reaction
35	Terizidone	Treatment Failure
36	Amoxil	Death
36	Augmentin	Abscond / refuse Rx
36	Augmentin	Death
36	Augmentin	Unknown
36	Capreomycin	Abscond / refuse Rx
36	Capreomycin	Changed medication
36	Clarithromycin	Abscond / refuse Rx
36	Clarithromycin	Death
36	Dapsone	Abscond / refuse Rx
36	Dapsone	Death
36	Ethambutol	Abscond / refuse Rx
36	Ethambutol	Death
36	Ethionamide	Abscond / refuse Rx
36	Ethionamide	Death
36	Ofloxacin	Abscond / refuse Rx
36	Ofloxacin	Death
36	PAS	Abscond / refuse Rx
36	PAS	Death
36	Pyrazinamide	Abscond / refuse Rx
36	Pyrazinamide	Death
36	Terizidone	Abscond / refuse Rx
36	Terizidone	Death
37	Amikacin	Unknown
37	Ethambutol	Unknown
37	Ethionamide	Unknown
37	Kanamycin	Changed medication
37	Ofloxacin	Unknown
37	Pyrazinamide	Unknown
38	Capreomycin	Death
38	Clofazimine	Death
38	Ethambutol	Changed medication
38	Ethambutol	Course of treatment complete
38	Ethambutol	Death
38	Ethionamide	Continued as OPD treatment
38	Ethionamide	Continued as OPD treatment
38	Ethionamide	Unknown
38	Isoniazid	Changed medication
38	Isoniazid	Course of treatment complete
38	Isoniazid	Death
38	Kanamycin	Continued as OPD treatment
38	Moxifloxacin	Continued as OPD treatment
38	Moxifloxacin	Death
38	Ofloxacin	Continued as OPD treatment
38	PAS	Death
38	Pyrazinamide	Continued as OPD treatment
38	Pyrazinamide	Continued as OPD treatment
38	Pyrazinamide	Death
38	Rifafour	Adverse Drug Reaction
38	Rifafour	Changed medication
38	Rifafour	Changed medication
38	Rifafour	Continued as OPD treatment
38	Rifampicin	Continued as OPD treatment
38	Rifampicin	Course of treatment complete
38	Streptomycin	Abscond / refuse Rx
38	Streptomycin	Continued as OPD treatment
38	Streptomycin	Continued as OPD treatment
38	Terizidone	Continued as OPD treatment
38	Terizidone	Death
39	Amikacin	Death
39	Amoxil	Death
39	Augmentin	Death
39	Ethambutol	Continued as OPD treatment
39	Ethambutol	Death
39	Ethionamide	Continued as OPD treatment
39	Ethionamide	Death
39	Kanamycin	Changed medication
39	Kanamycin	Course of treatment complete
39	Ofloxacin	Changed medication
39	Ofloxacin	Continued as OPD treatment
39	PAS	Death
39	Pyrazinamide	Course of treatment complete
39	Pyrazinamide	Death
39	Terizidone	Death
40	Capreomycin	Treatment Failure
40	Ethionamide	Treatment Failure
40	Ofloxacin	Treatment Failure
40	PAS	Treatment Failure
40	Pyrazinamide	Treatment Failure
40	Terizidone	Treatment Failure
41	Amoxil	Course of treatment complete
41	Augmentin	Course of treatment complete
41	Capreomycin	Treatment Failure
41	Capreomycin	Treatment Failure
41	Ethambutol	Changed medication
41	Ethionamide	Continued as OPD treatment
41	Isoniazid	Continued as OPD treatment
41	Kanamycin	Changed medication
41	Ofloxacin	Continued as OPD treatment
41	PAS	Treatment Failure
41	Pyrazinamide	Continued as OPD treatment
41	Terizidone	Continued as OPD treatment
42	Bedaquiline	Continued as OPD treatment
42	Capreomycin	Treatment Failure
42	Clofazimine	Treatment Failure
42	Ethambutol	Treatment Failure
42	Ethionamide	Unknown
42	Isoniazid	Treatment Failure
42	Linezolid	Continued as OPD treatment
42	Moxifloxacin	Treatment Failure
42	Moxifloxacin	Unknown
42	PAS	Treatment Failure
42	Pyrazinamide	Treatment Failure
42	Terizidone	Treatment Failure
43	Amoxil	Course of treatment complete
43	Augmentin	Course of treatment complete
43	Capreomycin	Course of treatment complete
43	Clarithromycin	Unknown
43	Dapsone	Unknown
43	Ethambutol	Continued as OPD treatment
43	Ethambutol	Course of treatment complete
43	Ethionamide	Continued as OPD treatment
43	Isoniazid	Continued as OPD treatment
43	Kanamycin	Changed medication
43	Ofloxacin	Continued as OPD treatment
43	PAS	Course of treatment complete
43	Pyrazinamide	Unknown
43	Terizidone	Continued as OPD treatment
44	Amikacin	Course of treatment complete
44	Capreomycin	Course of treatment complete
44	Ethambutol	Course of treatment complete
44	Ethionamide	Continued as OPD treatment
44	Ofloxacin	Continued as OPD treatment
44	PAS	Continued as OPD treatment
44	Pyrazinamide	Continued as OPD treatment
44	Terizidone	Continued as OPD treatment
45	Augmentin	Abscond / refuse Rx
45	Augmentin	Abscond / refuse Rx
45	Augmentin	Abscond / refuse Rx
45	Augmentin	Unknown
45	Capreomycin	Abscond / refuse Rx
45	Capreomycin	Abscond / refuse Rx
45	Capreomycin	Abscond / refuse Rx
45	Capreomycin	Abscond / refuse Rx
45	Capreomycin	Abscond / refuse Rx
45	Capreomycin	Abscond / refuse Rx
45	Capreomycin	Course of treatment complete
45	Capreomycin	Treatment Interruption
45	Clarithromycin	Abscond / refuse Rx
45	Clarithromycin	Abscond / refuse Rx
45	Clarithromycin	Abscond / refuse Rx
45	Clarithromycin	Unknown
45	Dapsone	Abscond / refuse Rx
45	Dapsone	Abscond / refuse Rx
45	Dapsone	Abscond / refuse Rx
45	Dapsone	Abscond / refuse Rx
45	Dapsone	Continued as OPD treatment
45	Dapsone	Treatment Interruption
45	Dapsone	Unknown
45	Ethambutol	Abscond / refuse Rx
45	Ethambutol	Abscond / refuse Rx
45	Ethambutol	Abscond / refuse Rx
45	Ethambutol	Abscond / refuse Rx
45	Ethambutol	Abscond / refuse Rx
45	Ethambutol	Continued as OPD treatment
45	Ethambutol	Continued as OPD treatment
45	Ethambutol	Treatment Interruption
45	Ethionamide	Abscond / refuse Rx
45	Ethionamide	Abscond / refuse Rx
45	Ethionamide	Abscond / refuse Rx
45	Ethionamide	Abscond / refuse Rx
45	Ethionamide	Abscond / refuse Rx
45	Ethionamide	Continued as OPD treatment
45	Ethionamide	Continued as OPD treatment
45	Ethionamide	Treatment Interruption
45	Kanamycin	Course of treatment complete
45	Ofloxacin	Continued as OPD treatment
45	PAS	Abscond / refuse Rx
45	PAS	Abscond / refuse Rx
45	PAS	Abscond / refuse Rx
45	PAS	Abscond / refuse Rx
45	PAS	Continued as OPD treatment
45	PAS	Treatment Interruption
45	Pyrazinamide	Abscond / refuse Rx
45	Pyrazinamide	Abscond / refuse Rx
45	Pyrazinamide	Abscond / refuse Rx
45	Pyrazinamide	Abscond / refuse Rx
45	Pyrazinamide	Abscond / refuse Rx
45	Pyrazinamide	Continued as OPD treatment
45	Pyrazinamide	Course of treatment complete
45	Pyrazinamide	Treatment Interruption
45	Streptomycin	Other reason
45	Terizidone	Abscond / refuse Rx
45	Terizidone	Abscond / refuse Rx
45	Terizidone	Abscond / refuse Rx
45	Terizidone	Abscond / refuse Rx
45	Terizidone	Abscond / refuse Rx
45	Terizidone	Continued as OPD treatment
45	Terizidone	Treatment Interruption
46	Capreomycin	Abscond / refuse Rx
46	Clofazimine	Abscond / refuse Rx
46	Clofazimine	Continued as OPD treatment
46	Ethambutol	Abscond / refuse Rx
46	Ethambutol	Transfer
46	Ethambutol	Unknown
46	Ethionamide	Transfer
46	Ethionamide	Treatment Interruption
46	Ethionamide	Unknown
46	Isoniazid	Abscond / refuse Rx
46	Isoniazid	Continued as OPD treatment
46	Kanamycin	Other reason
46	Kanamycin	Transfer
46	Kanamycin	Treatment Failure
46	Moxifloxacin	Abscond / refuse Rx
46	Moxifloxacin	Continued as OPD treatment
46	Ofloxacin	Transfer
46	Ofloxacin	Treatment Interruption
46	PAS	Abscond / refuse Rx
46	PAS	Adverse Drug Reaction
46	Pyrazinamide	Abscond / refuse Rx
46	Pyrazinamide	Adverse Drug Reaction
46	Pyrazinamide	Transfer
46	Pyrazinamide	Treatment Interruption
46	Terizidone	Abscond / refuse Rx
46	Terizidone	Adverse Drug Reaction
46	Terizidone	Treatment Interruption
47	Capreomycin	Adverse Drug Reaction
47	Ethambutol	Continued as OPD treatment
47	Ethionamide	Continued as OPD treatment
47	Isoniazid	Continued as OPD treatment
47	Ofloxacin	Continued as OPD treatment
47	PAS	Continued as OPD treatment
47	Pyrazinamide	Continued as OPD treatment
47	Terizidone	Continued as OPD treatment
49	Ethambutol	Continued as OPD treatment
49	Ethambutol	Continued as OPD treatment
49	Ethionamide	Continued as OPD treatment
49	Ethionamide	Continued as OPD treatment
49	Kanamycin	Continued as OPD treatment
49	Kanamycin	Course of treatment complete
49	Ofloxacin	Continued as OPD treatment
49	Ofloxacin	Continued as OPD treatment
49	Terizidone	Continued as OPD treatment
50	Capreomycin	Abscond / refuse Rx
50	Capreomycin	Treatment Interruption
50	Ethambutol	Abscond / refuse Rx
50	Ethambutol	Treatment Interruption
50	Ethionamide	Abscond / refuse Rx
50	Ethionamide	Treatment Interruption
50	Isoniazid	Abscond / refuse Rx
50	Isoniazid	Treatment Interruption
50	Kanamycin	Adverse Drug Reaction
50	Ofloxacin	Abscond / refuse Rx
50	Ofloxacin	Treatment Interruption
50	PAS	Abscond / refuse Rx
50	PAS	Treatment Interruption
50	Pyrazinamide	Abscond / refuse Rx
50	Pyrazinamide	Treatment Interruption
50	Terizidone	Abscond / refuse Rx
50	Terizidone	Treatment Interruption
51	Ethambutol	Abscond / refuse Rx
51	Ethambutol	Abscond / refuse Rx
51	Ethambutol	Death
51	Ethambutol	Treatment Interruption
51	Ethambutol	Treatment Interruption
51	Ethionamide	Abscond / refuse Rx
51	Ethionamide	Abscond / refuse Rx
51	Ethionamide	Abscond / refuse Rx
51	Ethionamide	Treatment Interruption
51	Ethionamide	Treatment Interruption
51	Isoniazid	Abscond / refuse Rx
51	Isoniazid	Treatment Interruption
51	Kanamycin	Adverse Drug Reaction
51	Ofloxacin	Abscond / refuse Rx
51	Ofloxacin	Abscond / refuse Rx
51	Ofloxacin	Death
51	Ofloxacin	Treatment Interruption
51	Ofloxacin	Treatment Interruption
51	Pyrazinamide	Abscond / refuse Rx
51	Pyrazinamide	Abscond / refuse Rx
51	Pyrazinamide	Death
51	Pyrazinamide	Treatment Interruption
51	Pyrazinamide	Treatment Interruption
51	Terizidone	Abscond / refuse Rx
51	Terizidone	Abscond / refuse Rx
51	Terizidone	Death
51	Terizidone	Treatment Interruption
51	Terizidone	Treatment Interruption
52	Augmentin	Abscond / refuse Rx
52	Capreomycin	Abscond / refuse Rx
52	Capreomycin	Treatment Failure
52	Clofazimine	Abscond / refuse Rx
52	Clofazimine	Death
52	Ethambutol	Abscond / refuse Rx
52	Ethambutol	Adverse Drug Reaction
52	Ethionamide	Adverse Drug Reaction
52	Ethionamide	Continued as OPD treatment
52	Ethionamide	Death
52	Isoniazid	Abscond / refuse Rx
52	Isoniazid	Death
52	Kanamycin	Continued as OPD treatment
52	Moxifloxacin	Abscond / refuse Rx
52	Moxifloxacin	Continued as OPD treatment
52	Moxifloxacin	Death
52	PAS	Abscond / refuse Rx
52	PAS	Death
52	Pyrazinamide	Abscond / refuse Rx
52	Pyrazinamide	Continued as OPD treatment
52	Terizidone	Abscond / refuse Rx
52	Terizidone	Continued as OPD treatment
52	Terizidone	Death
53	Bedaquiline	Course of treatment complete
53	Capreomycin	Continued as OPD treatment
53	Clofazimine	Continued as OPD treatment
53	Ethambutol	Adverse Drug Reaction
53	Levofloxacin	Changed medication
53	Moxifloxacin	Changed medication
53	PAS	Continued as OPD treatment
53	Pyrazinamide	Continued as OPD treatment
53	Terizidone	Continued as OPD treatment
54	Capreomycin	Adverse Drug Reaction
54	Capreomycin	Adverse Drug Reaction
54	Clarithromycin	Death
54	Clofazimine	Death
54	Dapsone	Unknown
54	Dapsone	Unknown
54	Ethambutol	Death
54	Ethionamide	Adverse Drug Reaction
54	Isoniazid	Death
54	Kanamycin	Treatment Failure
54	Moxifloxacin	Death
54	PAS	Death
54	Pyrazinamide	Death
54	Terizidone	Death
55	Amikacin	Changed medication
55	Ethambutol	Continued as OPD treatment
55	Ethionamide	Continued as OPD treatment
55	Ethionamide	Continued as OPD treatment
55	Isoniazid	Course of treatment complete
55	Kanamycin	Adverse Drug Reaction
55	Kanamycin	Continued as OPD treatment
55	Moxifloxacin	Changed medication
55	Ofloxacin	Continued as OPD treatment
55	Ofloxacin	Continued as OPD treatment
55	Pyrazinamide	Continued as OPD treatment
55	Pyrazinamide	Continued as OPD treatment
55	Terizidone	Continued as OPD treatment
55	Terizidone	Continued as OPD treatment
56	Capreomycin	Treatment Failure
56	Ethambutol	Death
56	Ethionamide	Treatment Failure
56	Kanamycin	Treatment Failure
56	Moxifloxacin	Death
56	Ofloxacin	Changed medication
56	PAS	Treatment Failure
56	Pyrazinamide	Death
56	Terizidone	Death
57	Clarithromycin	Unknown
57	Ethambutol	Continued as OPD treatment
57	Ethionamide	Continued as OPD treatment
57	Isoniazid	Continued as OPD treatment
57	Moxifloxacin	Continued as OPD treatment
57	PAS	Continued as OPD treatment
57	Pyrazinamide	Continued as OPD treatment
57	Terizidone	Continued as OPD treatment
58	Capreomycin	Adverse Drug Reaction
58	Clofazimine	Death
58	Ethambutol	Death
58	Ethionamide	Death
58	Isoniazid	Death
58	Moxifloxacin	Death
58	PAS	Death
58	Pyrazinamide	Death
58	Terizidone	Death
59	Capreomycin	Death
59	Clarithromycin	Death
59	Dapsone	Death
59	Ethionamide	Death
59	Ofloxacin	Death
59	PAS	Death
59	Terizidone	Death
60	Capreomycin	Abscond / refuse Rx
60	Clofazimine	Abscond / refuse Rx
60	Ethionamide	Abscond / refuse Rx
60	Isoniazid	Abscond / refuse Rx
60	Moxifloxacin	Abscond / refuse Rx
60	PAS	Abscond / refuse Rx
60	Pyrazinamide	Abscond / refuse Rx
60	Terizidone	Abscond / refuse Rx
61	Augmentin	Death
61	Capreomycin	Adverse Drug Reaction
61	Capreomycin	Death
61	Capreomycin	Unknown
61	Clofazimine	Death
61	Ethambutol	Death
61	Ethionamide	Adverse Drug Reaction
61	Ethionamide	Death
61	Isoniazid	Death
61	Kanamycin	Treatment Failure
61	Moxifloxacin	Death
61	Ofloxacin	Unknown
61	PAS	Death
61	Pyrazinamide	Adverse Drug Reaction
61	Pyrazinamide	Death
61	Terizidone	Adverse Drug Reaction
61	Terizidone	Death
62	Capreomycin	Adverse Drug Reaction
62	Ethionamide	Continued as OPD treatment
62	Ethionamide	Treatment Failure
62	Isoniazid	Continued as OPD treatment
62	Isoniazid	Treatment Failure
62	Kanamycin	Changed medication
62	Moxifloxacin	Changed medication
62	Moxifloxacin	Treatment Failure
62	Ofloxacin	Continued as OPD treatment
62	PAS	Continued as OPD treatment
62	PAS	Treatment Failure
62	Pyrazinamide	Continued as OPD treatment
62	Pyrazinamide	Treatment Failure
62	Terizidone	Continued as OPD treatment
62	Terizidone	Treatment Failure
63	Bedaquiline	Course of treatment complete
63	Capreomycin	Adverse Drug Reaction
63	Capreomycin	Adverse Drug Reaction
63	Clofazimine	Adverse Drug Reaction
63	Clofazimine	Continued as OPD treatment
63	Clofazimine	Unknown
63	Delamanid	Course of treatment complete
63	Ethambutol	Adverse Drug Reaction
63	Ethambutol	Treatment Failure
63	Ethionamide	Abscond / refuse Rx
63	Ethionamide	Adverse Drug Reaction
63	Ethionamide	Treatment Failure
63	Ethionamide	Treatment Interruption
63	Isoniazid	Adverse Drug Reaction
63	Isoniazid	Treatment Failure
63	Levofloxacin	Unknown
63	Linezolid	Continued as OPD treatment
63	Moxifloxacin	Adverse Drug Reaction
63	Moxifloxacin	Treatment Failure
63	Moxifloxacin	Treatment Interruption
63	PAS	Adverse Drug Reaction
63	PAS	Continued as OPD treatment
63	Pyrazinamide	Adverse Drug Reaction
63	Pyrazinamide	Treatment Interruption
63	Pyrazinamide	Unknown
63	Terizidone	Adverse Drug Reaction
63	Terizidone	Treatment Failure
63	Terizidone	Treatment Interruption
64	Capreomycin	Treatment Interruption
64	Clarithromycin	Treatment Interruption
64	Dapsone	Treatment Interruption
64	Ethambutol	Treatment Interruption
64	Ethambutol	Unknown
64	Ethionamide	Treatment Interruption
64	Isoniazid	Treatment Interruption
64	Isoniazid	Treatment Interruption
64	Ofloxacin	Treatment Interruption
64	PAS	Treatment Interruption
64	Pyrazinamide	Treatment Interruption
64	Terizidone	Treatment Interruption
65	Amoxil	Treatment Failure
65	Augmentin	Treatment Failure
65	Capreomycin	Course of treatment complete
65	Clarithromycin	Treatment Failure
65	Dapsone	Treatment Failure
65	Ethambutol	Continued as OPD treatment
65	Ethambutol	Continued as OPD treatment
65	Ethambutol	Granted leave
65	Ethionamide	Continued as OPD treatment
65	Ethionamide	Unknown
65	Isoniazid	Continued as OPD treatment
65	Isoniazid	Granted leave
65	Kanamycin	Course of treatment complete
65	Ofloxacin	Continued as OPD treatment
65	PAS	Treatment Failure
65	Pyrazinamide	Continued as OPD treatment
65	Rifafour	Unknown
65	Terizidone	Treatment Failure
66	Capreomycin	Adverse Drug Reaction
66	Clofazimine	Treatment Interruption
66	Ethambutol	Treatment Interruption
66	Ethionamide	Treatment Interruption
66	Isoniazid	Changed medication
66	Moxifloxacin	Treatment Interruption
66	PAS	Treatment Interruption
66	Pyrazinamide	Treatment Interruption
66	Terizidone	Treatment Interruption
67	Capreomycin	Treatment Interruption
67	Capreomycin	Treatment Interruption
67	Capreomycin	Treatment Interruption
67	Clofazimine	Treatment Interruption
67	Clofazimine	Treatment Interruption
67	Clofazimine	Treatment Interruption
67	Ethambutol	Treatment Interruption
67	Ethambutol	Treatment Interruption
67	Ethambutol	Treatment Interruption
67	Ethionamide	Treatment Interruption
67	Ethionamide	Treatment Interruption
67	Ethionamide	Treatment Interruption
67	Isoniazid	Treatment Interruption
67	Isoniazid	Treatment Interruption
67	Isoniazid	Treatment Interruption
67	Moxifloxacin	Treatment Interruption
67	Moxifloxacin	Treatment Interruption
67	Moxifloxacin	Treatment Interruption
67	PAS	Treatment Interruption
67	PAS	Treatment Interruption
67	PAS	Treatment Interruption
67	Pyrazinamide	Treatment Interruption
67	Pyrazinamide	Treatment Interruption
67	Pyrazinamide	Treatment Interruption
67	Terizidone	Treatment Interruption
67	Terizidone	Treatment Interruption
67	Terizidone	Treatment Interruption
68	Capreomycin	Treatment Interruption
68	Clofazimine	Treatment Interruption
68	Ethambutol	Treatment Interruption
68	Ethambutol	Treatment Interruption
68	Ethionamide	Treatment Interruption
68	Ethionamide	Treatment Interruption
68	Isoniazid	Treatment Interruption
68	Kanamycin	Treatment Interruption
68	Kanamycin	Treatment Interruption
68	Moxifloxacin	Treatment Interruption
68	Ofloxacin	Treatment Interruption
68	PAS	Abscond / refuse Rx
68	Pyrazinamide	Treatment Interruption
68	Pyrazinamide	Treatment Interruption
68	Terizidone	Treatment Interruption
69	Capreomycin	Course of treatment complete
69	Capreomycin	Treatment Failure
69	Clofazimine	Continued as OPD treatment
69	Clofazimine	Treatment Failure
69	Ethambutol	Continued as OPD treatment
69	Ethambutol	Treatment Failure
69	Ethionamide	Continued as OPD treatment
69	Ethionamide	Treatment Failure
69	Isoniazid	Continued as OPD treatment
69	Isoniazid	Treatment Failure
69	Moxifloxacin	Continued as OPD treatment
69	Moxifloxacin	Treatment Failure
69	PAS	Continued as OPD treatment
69	PAS	Treatment Failure
69	PAS	Unknown
69	Pyrazinamide	Continued as OPD treatment
69	Pyrazinamide	Treatment Failure
69	Terizidone	Continued as OPD treatment
69	Terizidone	Treatment Failure
70	Capreomycin	Adverse Drug Reaction
70	Clofazimine	Abscond / refuse Rx
70	Clofazimine	Abscond / refuse Rx
70	Ethambutol	Abscond / refuse Rx
70	Ethambutol	Abscond / refuse Rx
70	Ethionamide	Abscond / refuse Rx
70	Ethionamide	Abscond / refuse Rx
70	Ethionamide	Abscond / refuse Rx
70	Isoniazid	Abscond / refuse Rx
70	Isoniazid	Abscond / refuse Rx
70	Moxifloxacin	Abscond / refuse Rx
70	Moxifloxacin	Abscond / refuse Rx
70	PAS	Abscond / refuse Rx
70	Pyrazinamide	Abscond / refuse Rx
70	Pyrazinamide	Abscond / refuse Rx
70	Terizidone	Abscond / refuse Rx
70	Terizidone	Abscond / refuse Rx
71	Capreomycin	Adverse Drug Reaction
71	Capreomycin	Continued as OPD treatment
71	Capreomycin	Unknown
71	Clofazimine	Abscond / refuse Rx
71	Clofazimine	Death
71	Ethambutol	Continued as OPD treatment
71	Ethambutol	Unknown
71	Ethionamide	Abscond / refuse Rx
71	Ethionamide	Continued as OPD treatment
71	Ethionamide	Other reason
71	Isoniazid	Abscond / refuse Rx
71	Isoniazid	Adverse Drug Reaction
71	Isoniazid	Continued as OPD treatment
71	Isoniazid	Death
71	Kanamycin	Changed medication
71	Moxifloxacin	Abscond / refuse Rx
71	Moxifloxacin	Continued as OPD treatment
71	Moxifloxacin	Death
71	PAS	Abscond / refuse Rx
71	PAS	Abscond / refuse Rx
71	PAS	Continued as OPD treatment
71	Pyrazinamide	Abscond / refuse Rx
71	Pyrazinamide	Continued as OPD treatment
71	Pyrazinamide	Death
71	Terizidone	Abscond / refuse Rx
71	Terizidone	Continued as OPD treatment
71	Terizidone	Death
72	Amikacin	Adverse Drug Reaction
72	Amoxil	Death
72	Augmentin	Death
72	Capreomycin	Death
72	Ethambutol	Continued as OPD treatment
72	Ethambutol	Death
72	Ethionamide	Continued as OPD treatment
72	Ethionamide	Death
72	Kanamycin	Adverse Drug Reaction
72	Ofloxacin	Continued as OPD treatment
72	PAS	Death
72	Pyrazinamide	Continued as OPD treatment
72	Pyrazinamide	Death
72	Terizidone	Death
73	Amikacin	Course of treatment complete
73	Ethambutol	Continued as OPD treatment
73	Ethambutol	Unknown
73	Ethionamide	Continued as OPD treatment
73	Ethionamide	Death
73	Kanamycin	Changed medication
73	Kanamycin	Death
73	Ofloxacin	Continued as OPD treatment
73	Ofloxacin	Death
73	Pyrazinamide	Continued as OPD treatment
73	Pyrazinamide	Death
73	Terizidone	Death
74	Amoxil	Death
74	Augmentin	Death
74	Augmentin	Other reason
74	Capreomycin	Unknown
74	Capreomycin	Unknown
74	Capreomycin	Unknown
74	Clofazimine	Death
74	Ethambutol	Unknown
74	Ethambutol	Unknown
74	Isoniazid	Death
74	Moxifloxacin	Death
74	PAS	Death
74	Pyrazinamide	Death
74	Terizidone	Death
75	Clofazimine	Death
75	Ethionamide	Abscond / refuse Rx
75	Ethionamide	Death
75	Isoniazid	Death
75	Kanamycin	Abscond / refuse Rx
75	Kanamycin	Adverse Drug Reaction
75	Moxifloxacin	Abscond / refuse Rx
75	Moxifloxacin	Death
75	Pyrazinamide	Abscond / refuse Rx
75	Pyrazinamide	Death
75	Terizidone	Abscond / refuse Rx
75	Terizidone	Death
76	Augmentin	Death
76	Capreomycin	Abscond / refuse Rx
76	Clofazimine	Abscond / refuse Rx
76	Clofazimine	Death
76	Ethambutol	Abscond / refuse Rx
76	Ethionamide	Abscond / refuse Rx
76	Isoniazid	Abscond / refuse Rx
76	Isoniazid	Death
76	Kanamycin	Death
76	Kanamycin	Treatment Failure
76	Moxifloxacin	Abscond / refuse Rx
76	Moxifloxacin	Death
76	PAS	Abscond / refuse Rx
76	PAS	Death
76	Pyrazinamide	Abscond / refuse Rx
76	Terizidone	Abscond / refuse Rx
76	Terizidone	Death
77	Amoxil	Treatment Failure
77	Amoxil	Treatment Interruption
77	Augmentin	Treatment Failure
77	Augmentin	Treatment Interruption
77	Capreomycin	Treatment Failure
77	Capreomycin	Treatment Interruption
77	Clarithromycin	Treatment Failure
77	Clarithromycin	Treatment Interruption
77	Ethambutol	Treatment Failure
77	Ethionamide	Treatment Failure
77	Ethionamide	Treatment Interruption
77	Kanamycin	Treatment Failure
77	Ofloxacin	Treatment Failure
77	PAS	Treatment Failure
77	PAS	Treatment Interruption
77	Pyrazinamide	Treatment Failure
77	Pyrazinamide	Treatment Interruption
77	Terizidone	Treatment Failure
77	Terizidone	Treatment Interruption
78	Amoxil	Course of treatment complete
78	Augmentin	Course of treatment complete
78	Capreomycin	Treatment Failure
78	Capreomycin	Treatment Interruption
78	Clarithromycin	Course of treatment complete
78	Dapsone	Treatment Failure
78	Ethambutol	Changed medication
78	Ethionamide	Treatment Failure
78	Isoniazid	Adverse Drug Reaction
78	Isoniazid	Adverse Drug Reaction
78	Ofloxacin	Changed medication
78	Ofloxacin	Treatment Failure
78	PAS	Treatment Failure
78	Pyrazinamide	Treatment Failure
78	Terizidone	Treatment Failure
79	Amoxil	Treatment Interruption
79	Augmentin	Treatment Interruption
79	Capreomycin	Abscond / refuse Rx
79	Capreomycin	Treatment Interruption
79	Capreomycin	Treatment Interruption
79	Clarithromycin	Abscond / refuse Rx
79	Clarithromycin	Treatment Interruption
79	Dapsone	Treatment Failure
79	Ethambutol	Abscond / refuse Rx
79	Ethambutol	Abscond / refuse Rx
79	Ethambutol	Treatment Failure
79	Ethambutol	Treatment Interruption
79	Ethambutol	Treatment Interruption
79	Ethionamide	Abscond / refuse Rx
79	Ethionamide	Abscond / refuse Rx
79	Ethionamide	Treatment Failure
79	Ethionamide	Treatment Interruption
79	Ethionamide	Treatment Interruption
79	Kanamycin	Abscond / refuse Rx
79	Kanamycin	Treatment Failure
79	Ofloxacin	Abscond / refuse Rx
79	Ofloxacin	Abscond / refuse Rx
79	Ofloxacin	Treatment Failure
79	Ofloxacin	Treatment Interruption
79	PAS	Abscond / refuse Rx
79	PAS	Treatment Interruption
79	PAS	Treatment Interruption
79	Pyrazinamide	Abscond / refuse Rx
79	Pyrazinamide	Abscond / refuse Rx
79	Pyrazinamide	Treatment Failure
79	Pyrazinamide	Treatment Interruption
79	Pyrazinamide	Treatment Interruption
79	Terizidone	Abscond / refuse Rx
79	Terizidone	Treatment Failure
79	Terizidone	Treatment Interruption
79	Terizidone	Treatment Interruption
80	Amoxil	Course of treatment complete
80	Amoxil	Death
80	Augmentin	Death
80	Capreomycin	Continued as OPD treatment
80	Capreomycin	Death
80	Capreomycin	Treatment Interruption
80	Clofazimine	Death
80	Ethambutol	Adverse Drug Reaction
80	Ethambutol	Continued as OPD treatment
80	Ethionamide	Adverse Drug Reaction
80	Ethionamide	Adverse Drug Reaction
80	Ethionamide	Continued as OPD treatment
80	Isoniazid	Death
80	Moxifloxacin	Death
80	Ofloxacin	Continued as OPD treatment
80	PAS	Death
80	Pyrazinamide	Death
80	Pyrazinamide	Other reason
80	Terizidone	Death
80	Terizidone	Other reason
81	Bedaquiline	Death
81	Capreomycin	Abscond / refuse Rx
81	Clofazimine	Abscond / refuse Rx
81	Ethionamide	Abscond / refuse Rx
81	Isoniazid	Abscond / refuse Rx
81	Linezolid	Death
81	Moxifloxacin	Abscond / refuse Rx
81	PAS	Abscond / refuse Rx
81	Pyrazinamide	Abscond / refuse Rx
81	Terizidone	Abscond / refuse Rx
82	Clarithromycin	Continued as OPD treatment
82	Dapsone	Continued as OPD treatment
82	Ethambutol	Continued as OPD treatment
82	Ethionamide	Continued as OPD treatment
82	Isoniazid	Adverse Drug Reaction
82	Kanamycin	Continued as OPD treatment
82	Ofloxacin	Continued as OPD treatment
82	PAS	Continued as OPD treatment
82	Pyrazinamide	Continued as OPD treatment
82	Terizidone	Continued as OPD treatment
83	Amoxil	Other reason
83	Amoxil	Treatment Failure
83	Augmentin	Other reason
83	Augmentin	Treatment Failure
83	Capreomycin	Adverse Drug Reaction
83	Capreomycin	Treatment Failure
83	Clofazimine	Treatment Failure
83	Ethambutol	Continued as OPD treatment
83	Ethambutol	Continued as OPD treatment
83	Ethambutol	Treatment Failure
83	Ethionamide	Adverse Drug Reaction
83	Ethionamide	Continued as OPD treatment
83	Ethionamide	Continued as OPD treatment
83	Isoniazid	Treatment Failure
83	Kanamycin	Continued as OPD treatment
83	Kanamycin	Continued as OPD treatment
83	Moxifloxacin	Treatment Failure
83	Ofloxacin	Continued as OPD treatment
83	Ofloxacin	Continued as OPD treatment
83	PAS	Other reason
83	PAS	Treatment Failure
83	Pyrazinamide	Continued as OPD treatment
83	Pyrazinamide	Continued as OPD treatment
83	Pyrazinamide	Treatment Failure
83	Terizidone	Abscond / refuse Rx
83	Terizidone	Abscond / refuse Rx
84	Amoxil	Course of treatment complete
84	Augmentin	Course of treatment complete
84	Augmentin	Death
84	Capreomycin	Course of treatment complete
84	Capreomycin	Death
84	Capreomycin	Treatment Failure
84	Clarithromycin	Unknown
84	Clofazimine	Death
84	Ethambutol	Continued as OPD treatment
84	Ethambutol	Death
84	Ethambutol	Treatment Failure
84	Ethionamide	Continued as OPD treatment
84	Ethionamide	Death
84	Ethionamide	Treatment Failure
84	Isoniazid	Continued as OPD treatment
84	Isoniazid	Death
84	Isoniazid	Treatment Failure
84	Kanamycin	Treatment Failure
84	Moxifloxacin	Death
84	Ofloxacin	Continued as OPD treatment
84	Ofloxacin	Treatment Failure
84	PAS	Continued as OPD treatment
84	PAS	Death
84	PAS	Treatment Failure
84	Pyrazinamide	Continued as OPD treatment
84	Pyrazinamide	Death
84	Pyrazinamide	Treatment Failure
84	Terizidone	Continued as OPD treatment
84	Terizidone	Death
84	Terizidone	Treatment Failure
85	Capreomycin	Adverse Drug Reaction
85	Ethambutol	Continued as OPD treatment
85	Ethambutol	Death
85	Ethambutol	Transfer
85	Ethambutol	Transfer
85	Ethionamide	Adverse Drug Reaction
85	Ethionamide	Continued as OPD treatment
85	Ethionamide	Transfer
85	Kanamycin	Transfer
85	Kanamycin	Treatment Failure
85	Moxifloxacin	Death
85	Moxifloxacin	Transfer
85	Ofloxacin	Continued as OPD treatment
85	Ofloxacin	Transfer
85	PAS	Death
85	Pyrazinamide	Continued as OPD treatment
85	Pyrazinamide	Death
85	Pyrazinamide	Transfer
85	Pyrazinamide	Transfer
85	Pyrazinamide	Unknown
85	Terizidone	Continued as OPD treatment
85	Terizidone	Death
85	Terizidone	Transfer
86	Amikacin	Abscond / refuse Rx
86	Amoxil	Death
86	Augmentin	Death
86	Capreomycin	Death
86	Clarithromycin	Death
86	Dapsone	Death
86	Ethambutol	Changed medication
86	Ethionamide	Changed medication
86	Kanamycin	Adverse Drug Reaction
86	Ofloxacin	Changed medication
86	PAS	Death
86	Pyrazinamide	Death
86	Terizidone	Death
87	Capreomycin	Abscond / refuse Rx
87	Capreomycin	Abscond / refuse Rx
87	Dapsone	Treatment Failure
87	Ethambutol	Adverse Drug Reaction
87	Ethambutol	Continued as OPD treatment
87	Ethambutol	Other reason
87	Ethambutol	Other reason
87	Ethionamide	Continued as OPD treatment
87	Ethionamide	Continued as OPD treatment
87	Isoniazid	Continued as OPD treatment
87	Ofloxacin	Continued as OPD treatment
87	Ofloxacin	Continued as OPD treatment
87	PAS	Abscond / refuse Rx
87	PAS	Continued as OPD treatment
87	Pyrazinamide	Continued as OPD treatment
87	Pyrazinamide	Continued as OPD treatment
87	Terizidone	Continued as OPD treatment
87	Terizidone	Continued as OPD treatment
88	Capreomycin	Transfer
88	Ethambutol	Transfer
88	Ethambutol	Unknown
88	Ethionamide	Transfer
88	Isoniazid	Transfer
88	Ofloxacin	Transfer
88	PAS	Transfer
88	Pyrazinamide	Transfer
88	Terizidone	Transfer
89	Amikacin	Changed medication
89	Capreomycin	Adverse Drug Reaction
89	Capreomycin	Adverse Drug Reaction
89	Clarithromycin	Death
89	Dapsone	Death
89	Ethambutol	Adverse Drug Reaction
89	Ethambutol	Death
89	Ethionamide	Adverse Drug Reaction
89	Ethionamide	Death
89	Isoniazid	Adverse Drug Reaction
89	Ofloxacin	Adverse Drug Reaction
89	Ofloxacin	Death
89	PAS	Adverse Drug Reaction
89	PAS	Death
89	Pyrazinamide	Adverse Drug Reaction
89	Pyrazinamide	Death
89	Terizidone	Adverse Drug Reaction
89	Terizidone	Unknown
90	Amoxil	Continued as OPD treatment
90	Amoxil	Granted leave
90	Augmentin	Continued as OPD treatment
90	Augmentin	Granted leave
90	Capreomycin	Course of treatment complete
90	Capreomycin	Granted leave
90	Ethambutol	Continued as OPD treatment
90	Ethambutol	Granted leave
90	Ethionamide	Changed medication
90	Ethionamide	Granted leave
90	Isoniazid	Continued as OPD treatment
90	Isoniazid	Granted leave
90	Ofloxacin	Continued as OPD treatment
90	Ofloxacin	Granted leave
90	PAS	Continued as OPD treatment
90	PAS	Granted leave
90	Pyrazinamide	Continued as OPD treatment
90	Pyrazinamide	Granted leave
90	Terizidone	Continued as OPD treatment
90	Terizidone	Granted leave
91	Capreomycin	Adverse Drug Reaction
91	Capreomycin	Adverse Drug Reaction
91	Clofazimine	Abscond / refuse Rx
91	Ethambutol	Unknown
91	Isoniazid	Abscond / refuse Rx
91	Levofloxacin	Changed medication
91	Moxifloxacin	Abscond / refuse Rx
91	Moxifloxacin	Changed medication
91	PAS	Unknown
91	Pyrazinamide	Abscond / refuse Rx
91	Terizidone	Abscond / refuse Rx
91	Terizidone	Unknown
92	Capreomycin	Adverse Drug Reaction
92	Capreomycin	Treatment Failure
92	Ethambutol	Treatment Failure
92	Ethionamide	Treatment Failure
92	Isoniazid	Treatment Failure
92	Ofloxacin	Treatment Failure
92	PAS	Treatment Failure
92	Pyrazinamide	Treatment Failure
92	Terizidone	Treatment Failure
93	Amoxil	Continued as OPD treatment
93	Amoxil	Unknown
93	Augmentin	Continued as OPD treatment
93	Augmentin	Unknown
93	Capreomycin	Continued as OPD treatment
93	Capreomycin	Treatment Failure
93	Capreomycin	Unknown
93	Ethambutol	Continued as OPD treatment
93	Ethambutol	Continued as OPD treatment
93	Ethionamide	Abscond / refuse Rx
93	Ethionamide	Adverse Drug Reaction
93	Ethionamide	Adverse Drug Reaction
93	Ethionamide	Continued as OPD treatment
93	Isoniazid	Unknown
93	Moxifloxacin	Continued as OPD treatment
93	Ofloxacin	Changed medication
93	Ofloxacin	Continued as OPD treatment
93	PAS	Continued as OPD treatment
93	PAS	Treatment Failure
93	Pyrazinamide	Continued as OPD treatment
93	Pyrazinamide	Continued as OPD treatment
93	Terizidone	Continued as OPD treatment
93	Terizidone	Continued as OPD treatment
94	Ethionamide	Abscond / refuse Rx
94	Kanamycin	Abscond / refuse Rx
94	Moxifloxacin	Abscond / refuse Rx
94	Pyrazinamide	Abscond / refuse Rx
94	Terizidone	Abscond / refuse Rx
95	Capreomycin	Adverse Drug Reaction
95	Clofazimine	Continued as OPD treatment
95	Ethambutol	Continued as OPD treatment
95	Ethionamide	Continued as OPD treatment
95	Isoniazid	Unknown
95	Kanamycin	Adverse Drug Reaction
95	Linezolid	Continued as OPD treatment
95	Moxifloxacin	Continued as OPD treatment
95	Moxifloxacin	Continued as OPD treatment
95	PAS	Continued as OPD treatment
95	Pyrazinamide	Adverse Drug Reaction
95	Pyrazinamide	Continued as OPD treatment
95	Terizidone	Continued as OPD treatment
95	Terizidone	Continued as OPD treatment
96	Capreomycin	Treatment Failure
96	Dapsone	Treatment Failure
96	Ethambutol	Course of treatment complete
96	Ethionamide	Treatment Failure
96	Kanamycin	Adverse Drug Reaction
96	Ofloxacin	Treatment Failure
96	PAS	Treatment Failure
96	Pyrazinamide	Treatment Failure
96	Terizidone	Treatment Failure
97	Ethambutol	Continued as OPD treatment
97	Ethambutol	Other reason
97	Ethionamide	Other reason
97	Isoniazid	Continued as OPD treatment
97	Kanamycin	Continued as OPD treatment
97	Ofloxacin	Continued as OPD treatment
97	Pyrazinamide	Continued as OPD treatment
97	Terizidone	Continued as OPD treatment
98	Capreomycin	Course of treatment complete
98	Clofazimine	Continued as OPD treatment
98	Clofazimine	Treatment continued beyond sensor date
98	Ethambutol	Continued as OPD treatment
98	Ethionamide	Continued as OPD treatment
98	Isoniazid	Adverse Drug Reaction
98	Isoniazid	Continued as OPD treatment
98	Levofloxacin	Treatment continued beyond sensor date
98	Moxifloxacin	Continued as OPD treatment
98	PAS	Continued as OPD treatment
98	PAS	Treatment continued beyond sensor date
98	Pyrazinamide	Continued as OPD treatment
98	Pyrazinamide	Treatment continued beyond sensor date
98	Terizidone	Adverse Drug Reaction
98	Terizidone	Continued as OPD treatment
99	Augmentin	Abscond / refuse Rx
99	Capreomycin	Abscond / refuse Rx
99	Capreomycin	Death
99	Clofazimine	Abscond / refuse Rx
99	Clofazimine	Death
99	Ethambutol	Abscond / refuse Rx
99	Ethionamide	Abscond / refuse Rx
99	Ethionamide	Abscond / refuse Rx
99	Ethionamide	Abscond / refuse Rx
99	Ethionamide	Death
99	Isoniazid	Abscond / refuse Rx
99	Isoniazid	Death
99	Kanamycin	Abscond / refuse Rx
99	Kanamycin	Abscond / refuse Rx
99	Moxifloxacin	Abscond / refuse Rx
99	Moxifloxacin	Abscond / refuse Rx
99	Moxifloxacin	Abscond / refuse Rx
99	Moxifloxacin	Death
99	PAS	Abscond / refuse Rx
99	PAS	Death
99	Pyrazinamide	Abscond / refuse Rx
99	Pyrazinamide	Abscond / refuse Rx
99	Pyrazinamide	Abscond / refuse Rx
99	Pyrazinamide	Death
99	Terizidone	Abscond / refuse Rx
99	Terizidone	Abscond / refuse Rx
99	Terizidone	Abscond / refuse Rx
99	Terizidone	Death
100	Amoxil	Death
100	Augmentin	Death
100	Capreomycin	Death
100	Clarithromycin	Death
100	Ethambutol	Death
100	Ethionamide	Death
100	Kanamycin	Adverse Drug Reaction
100	Ofloxacin	Treatment Failure
100	PAS	Death
100	Pyrazinamide	Death
100	Pyrazinamide	Treatment Failure
100	Terizidone	Death
101	Capreomycin	Treatment Interruption
101	Clarithromycin	Treatment Interruption
101	Dapsone	Treatment Interruption
101	Ethambutol	Adverse Drug Reaction
101	Ethionamide	Treatment Interruption
101	Isoniazid	Treatment Interruption
101	Ofloxacin	Treatment Interruption
101	PAS	Treatment Interruption
101	Pyrazinamide	Treatment Interruption
101	Terizidone	Treatment Interruption
102	Amoxil	Unknown
102	Augmentin	Treatment Failure
102	Capreomycin	Adverse Drug Reaction
102	Capreomycin	Course of treatment complete
102	Capreomycin	Granted leave
102	Capreomycin	Transfer
102	Clofazimine	Treatment Failure
102	Ethambutol	Continued as OPD treatment
102	Ethambutol	Granted leave
102	Ethambutol	Transfer
102	Ethambutol	Unknown
102	Ethionamide	Continued as OPD treatment
102	Ethionamide	Granted leave
102	Ethionamide	Transfer
102	Ethionamide	Treatment Failure
102	Isoniazid	Continued as OPD treatment
102	Isoniazid	Granted leave
102	Isoniazid	Treatment Failure
102	Kanamycin	Treatment Failure
102	Moxifloxacin	Continued as OPD treatment
102	Moxifloxacin	Granted leave
102	Moxifloxacin	Treatment Failure
102	Ofloxacin	Changed medication
102	Ofloxacin	Transfer
102	Ofloxacin	Unknown
102	PAS	Continued as OPD treatment
102	PAS	Granted leave
102	PAS	Treatment Failure
102	Pyrazinamide	Continued as OPD treatment
102	Pyrazinamide	Granted leave
102	Pyrazinamide	Transfer
102	Pyrazinamide	Treatment Failure
102	Terizidone	Continued as OPD treatment
102	Terizidone	Granted leave
102	Terizidone	Treatment Failure
103	Augmentin	Course of treatment complete
103	Augmentin	Other reason
103	Capreomycin	Adverse Drug Reaction
103	Capreomycin	Death
103	Capreomycin	Treatment Interruption
103	Capreomycin	Unknown
103	Clofazimine	Death
103	Clofazimine	Treatment Interruption
103	Clofazimine	Unknown
103	Ethambutol	Course of treatment complete
103	Ethionamide	Adverse Drug Reaction
103	Ethionamide	Course of treatment complete
103	Ethionamide	Treatment Interruption
103	Isoniazid	Unknown
103	Moxifloxacin	Death
103	Moxifloxacin	Treatment Interruption
103	Moxifloxacin	Unknown
103	PAS	Adverse Drug Reaction
103	PAS	Treatment Interruption
103	PAS	Unknown
103	Pyrazinamide	Death
103	Pyrazinamide	Treatment Interruption
103	Pyrazinamide	Unknown
103	Terizidone	Death
103	Terizidone	Treatment Interruption
103	Terizidone	Unknown
104	Ethambutol	Continued as OPD treatment
104	Ethionamide	Continued as OPD treatment
104	Ethionamide	Death
104	Kanamycin	Continued as OPD treatment
104	Kanamycin	Death
104	Moxifloxacin	Continued as OPD treatment
104	Moxifloxacin	Death
104	Pyrazinamide	Continued as OPD treatment
104	Pyrazinamide	Death
104	Terizidone	Continued as OPD treatment
104	Terizidone	Death
105	Amoxil	Unknown
105	Augmentin	Unknown
105	Capreomycin	Granted leave
105	Capreomycin	Treatment Failure
105	Clarithromycin	Unknown
105	Ethambutol	Granted leave
105	Ethambutol	Treatment Failure
105	Ethionamide	Changed medication
105	Kanamycin	Changed medication
105	Ofloxacin	Changed medication
105	Ofloxacin	Granted leave
105	Ofloxacin	Treatment Failure
105	Ofloxacin	Unknown
105	Ofloxacin	Unknown
105	PAS	Granted leave
105	PAS	Treatment Failure
105	Pyrazinamide	Granted leave
105	Pyrazinamide	Treatment Failure
105	Terizidone	Granted leave
105	Terizidone	Treatment Failure
106	Bedaquiline	Continued as OPD treatment
106	Clofazimine	Continued as OPD treatment
106	Ethambutol	Continued as OPD treatment
106	Ethambutol	Continued as OPD treatment
106	Isoniazid	Continued as OPD treatment
106	Isoniazid	Continued as OPD treatment
106	Kanamycin	Adverse Drug Reaction
106	Kanamycin	Course of treatment complete
106	Levofloxacin	Continued as OPD treatment
106	Moxifloxacin	Continued as OPD treatment
106	PAS	Course of treatment complete
106	Pyrazinamide	Continued as OPD treatment
106	Pyrazinamide	Continued as OPD treatment
106	Terizidone	Continued as OPD treatment
106	Terizidone	Continued as OPD treatment
107	Capreomycin	Changed medication
107	Capreomycin	Granted leave
107	Ethambutol	Granted leave
107	Ethambutol	Treatment Failure
107	Ethambutol	Treatment Interruption
107	Ethionamide	Granted leave
107	Ethionamide	Treatment Failure
107	Ethionamide	Treatment Interruption
107	Ofloxacin	Granted leave
107	Ofloxacin	Treatment Interruption
107	Ofloxacin	Treatment Interruption
107	PAS	Granted leave
107	PAS	Unknown
107	Pyrazinamide	Granted leave
107	Pyrazinamide	Treatment Failure
107	Pyrazinamide	Treatment Interruption
107	Terizidone	Granted leave
107	Terizidone	Treatment Failure
107	Terizidone	Treatment Interruption
108	Bedaquiline	Unknown
108	Capreomycin	Changed medication
108	Clarithromycin	Unknown
108	Clarithromycin	Unknown
108	Ethambutol	Treatment Interruption
108	Ethionamide	Treatment Interruption
108	Isoniazid	Treatment Interruption
108	Kanamycin	Changed medication
108	Ofloxacin	Treatment Interruption
108	PAS	Treatment Interruption
108	Pyrazinamide	Treatment Interruption
108	Terizidone	Treatment Interruption
109	Capreomycin	Adverse Drug Reaction
109	Capreomycin	Course of treatment complete
109	Clofazimine	Adverse Drug Reaction
109	Clofazimine	Continued as OPD treatment
109	Ethambutol	Adverse Drug Reaction
109	Ethambutol	Continued as OPD treatment
109	Ethionamide	Adverse Drug Reaction
109	Ethionamide	Continued as OPD treatment
109	Moxifloxacin	Adverse Drug Reaction
109	Moxifloxacin	Continued as OPD treatment
109	PAS	Adverse Drug Reaction
109	PAS	Continued as OPD treatment
109	Pyrazinamide	Adverse Drug Reaction
109	Pyrazinamide	Continued as OPD treatment
109	Terizidone	Adverse Drug Reaction
109	Terizidone	Continued as OPD treatment
110	Capreomycin	Adverse Drug Reaction
110	Clofazimine	Continued as OPD treatment
110	Ethambutol	Continued as OPD treatment
110	Ethionamide	Continued as OPD treatment
110	Kanamycin	Treatment Failure
110	Moxifloxacin	Continued as OPD treatment
110	PAS	Continued as OPD treatment
110	Pyrazinamide	Continued as OPD treatment
110	Terizidone	Continued as OPD treatment
111	Augmentin	Continued as OPD treatment
111	Capreomycin	Course of treatment complete
111	Clarithromycin	Course of treatment complete
111	Clofazimine	Continued as OPD treatment
111	Ethambutol	Continued as OPD treatment
111	Ethionamide	Continued as OPD treatment
111	Isoniazid	Adverse Drug Reaction
111	Isoniazid	Continued as OPD treatment
111	Moxifloxacin	Continued as OPD treatment
111	PAS	Continued as OPD treatment
111	Pyrazinamide	Continued as OPD treatment
111	Pyrazinamide	Unknown
111	Terizidone	Adverse Drug Reaction
111	Terizidone	Continued as OPD treatment
112	Ethambutol	Continued as OPD treatment
112	Ethionamide	Continued as OPD treatment
112	Kanamycin	Continued as OPD treatment
112	Ofloxacin	Continued as OPD treatment
112	Pyrazinamide	Continued as OPD treatment
113	Augmentin	Continued as OPD treatment
113	Capreomycin	Abscond / refuse Rx
113	Clarithromycin	Abscond / refuse Rx
113	Ethambutol	Abscond / refuse Rx
113	Ethionamide	Abscond / refuse Rx
113	Ethionamide	Continued as OPD treatment
113	Isoniazid	Abscond / refuse Rx
113	Isoniazid	Continued as OPD treatment
113	Kanamycin	Changed medication
113	Moxifloxacin	Continued as OPD treatment
113	Ofloxacin	Abscond / refuse Rx
113	PAS	Abscond / refuse Rx
113	PAS	Continued as OPD treatment
113	Pyrazinamide	Abscond / refuse Rx
113	Pyrazinamide	Continued as OPD treatment
113	Terizidone	Abscond / refuse Rx
113	Terizidone	Continued as OPD treatment
114	Amoxil	Course of treatment complete
114	Augmentin	Course of treatment complete
114	Capreomycin	Course of treatment complete
114	Clarithromycin	Course of treatment complete
114	Ethambutol	Continued as OPD treatment
114	Ofloxacin	Continued as OPD treatment
114	PAS	Continued as OPD treatment
114	Pyrazinamide	Continued as OPD treatment
114	Terizidone	Continued as OPD treatment
115	Capreomycin	Treatment Failure
115	Capreomycin	Treatment Interruption
115	Clarithromycin	Unknown
115	Ethambutol	Treatment Failure
115	Ethambutol	Treatment Interruption
115	Ethionamide	Adverse Drug Reaction
115	Kanamycin	Changed medication
115	Ofloxacin	Treatment Failure
115	Ofloxacin	Treatment Interruption
115	PAS	Treatment Failure
115	PAS	Treatment Interruption
115	Pyrazinamide	Treatment Failure
115	Pyrazinamide	Treatment Interruption
115	Terizidone	Treatment Failure
115	Terizidone	Treatment Interruption
116	Amikacin	Abscond / refuse Rx
116	Capreomycin	Death
116	Ethambutol	Continued as OPD treatment
116	Ethambutol	Death
116	Ethionamide	Continued as OPD treatment
116	Ethionamide	Death
116	Ethionamide	Treatment Interruption
116	Ofloxacin	Continued as OPD treatment
116	Ofloxacin	Death
116	Ofloxacin	Treatment Interruption
116	PAS	Death
116	Pyrazinamide	Continued as OPD treatment
116	Pyrazinamide	Death
116	Pyrazinamide	Treatment Interruption
116	Terizidone	Death
116	Terizidone	Treatment Interruption
117	Capreomycin	Treatment Failure
117	Clofazimine	Continued as OPD treatment
117	Dapsone	Continued as OPD treatment
117	Ethambutol	Treatment Failure
117	Ethambutol	Unknown
117	Ethambutol	Unknown
117	Ethionamide	Continued as OPD treatment
117	Ethionamide	Continued as OPD treatment
117	Isoniazid	Treatment Failure
117	Isoniazid	Unknown
117	Kanamycin	Adverse Drug Reaction
117	Kanamycin	Continued as OPD treatment
117	Ofloxacin	Continued as OPD treatment
117	Ofloxacin	Treatment Failure
117	PAS	Treatment Failure
117	Pyrazinamide	Continued as OPD treatment
117	Pyrazinamide	Treatment Failure
117	Terizidone	Continued as OPD treatment
117	Terizidone	Continued as OPD treatment
118	Capreomycin	Abscond / refuse Rx
118	Capreomycin	Adverse Drug Reaction
118	Clofazimine	Abscond / refuse Rx
118	Ethionamide	Treatment Interruption
118	Ethionamide	Treatment Interruption
118	Ethionamide	Treatment Interruption
118	Ethionamide	Treatment Interruption
118	Isoniazid	Abscond / refuse Rx
118	Kanamycin	Adverse Drug Reaction
118	Kanamycin	Treatment Interruption
118	Moxifloxacin	Treatment Interruption
118	Moxifloxacin	Treatment Interruption
118	Moxifloxacin	Treatment Interruption
118	Moxifloxacin	Treatment Interruption
118	Moxifloxacin	Unknown
118	PAS	Abscond / refuse Rx
118	Pyrazinamide	Abscond / refuse Rx
118	Pyrazinamide	Treatment Interruption
118	Pyrazinamide	Treatment Interruption
118	Pyrazinamide	Treatment Interruption
118	Pyrazinamide	Treatment Interruption
118	Terizidone	Abscond / refuse Rx
118	Terizidone	Treatment Interruption
118	Terizidone	Treatment Interruption
118	Terizidone	Treatment Interruption
118	Terizidone	Treatment Interruption
119	Capreomycin	Other reason
119	Capreomycin	Other reason
119	Capreomycin	Other reason
119	Capreomycin	Treatment Failure
119	Ethambutol	Treatment Failure
119	Ethionamide	Abscond / refuse Rx
119	Ethionamide	Abscond / refuse Rx
119	Isoniazid	Adverse Drug Reaction
119	Kanamycin	Changed medication
119	Moxifloxacin	Treatment Failure
119	Ofloxacin	Changed medication
119	PAS	Treatment Failure
119	Pyrazinamide	Treatment Failure
119	Terizidone	Treatment Failure
119	Terizidone	Treatment Interruption
120	Amikacin	Changed medication
120	Amoxil	Continued as OPD treatment
120	Augmentin	Adverse Drug Reaction
120	Augmentin	Continued as OPD treatment
120	Augmentin	Unknown
120	Capreomycin	Adverse Drug Reaction
120	Capreomycin	Course of treatment complete
120	Capreomycin	Unknown
120	Clofazimine	Adverse Drug Reaction
120	Clofazimine	Death
120	Clofazimine	Other reason
120	Ethambutol	Adverse Drug Reaction
120	Ethambutol	Adverse Drug Reaction
120	Ethambutol	Continued as OPD treatment
120	Ethambutol	Continued as OPD treatment
120	Ethambutol	Continued as OPD treatment
120	Ethambutol	Continued as OPD treatment
120	Ethionamide	Adverse Drug Reaction
120	Ethionamide	Adverse Drug Reaction
[truncated: 2,356 more rows]
